# Supplementary material for: The synergism of SMC1A cohesin gene silencing and bevacizumab against colorectal cancer
Source: PubMed Central journal article supplement (PMC10870497; doi:10.1186/s13046-024-02976-2), 2024-02-16
Supplement: 13046_2024_2976_MOESM2_ESM.pdf [file 13046_2024_2976_MOESM2_ESM.pdf]

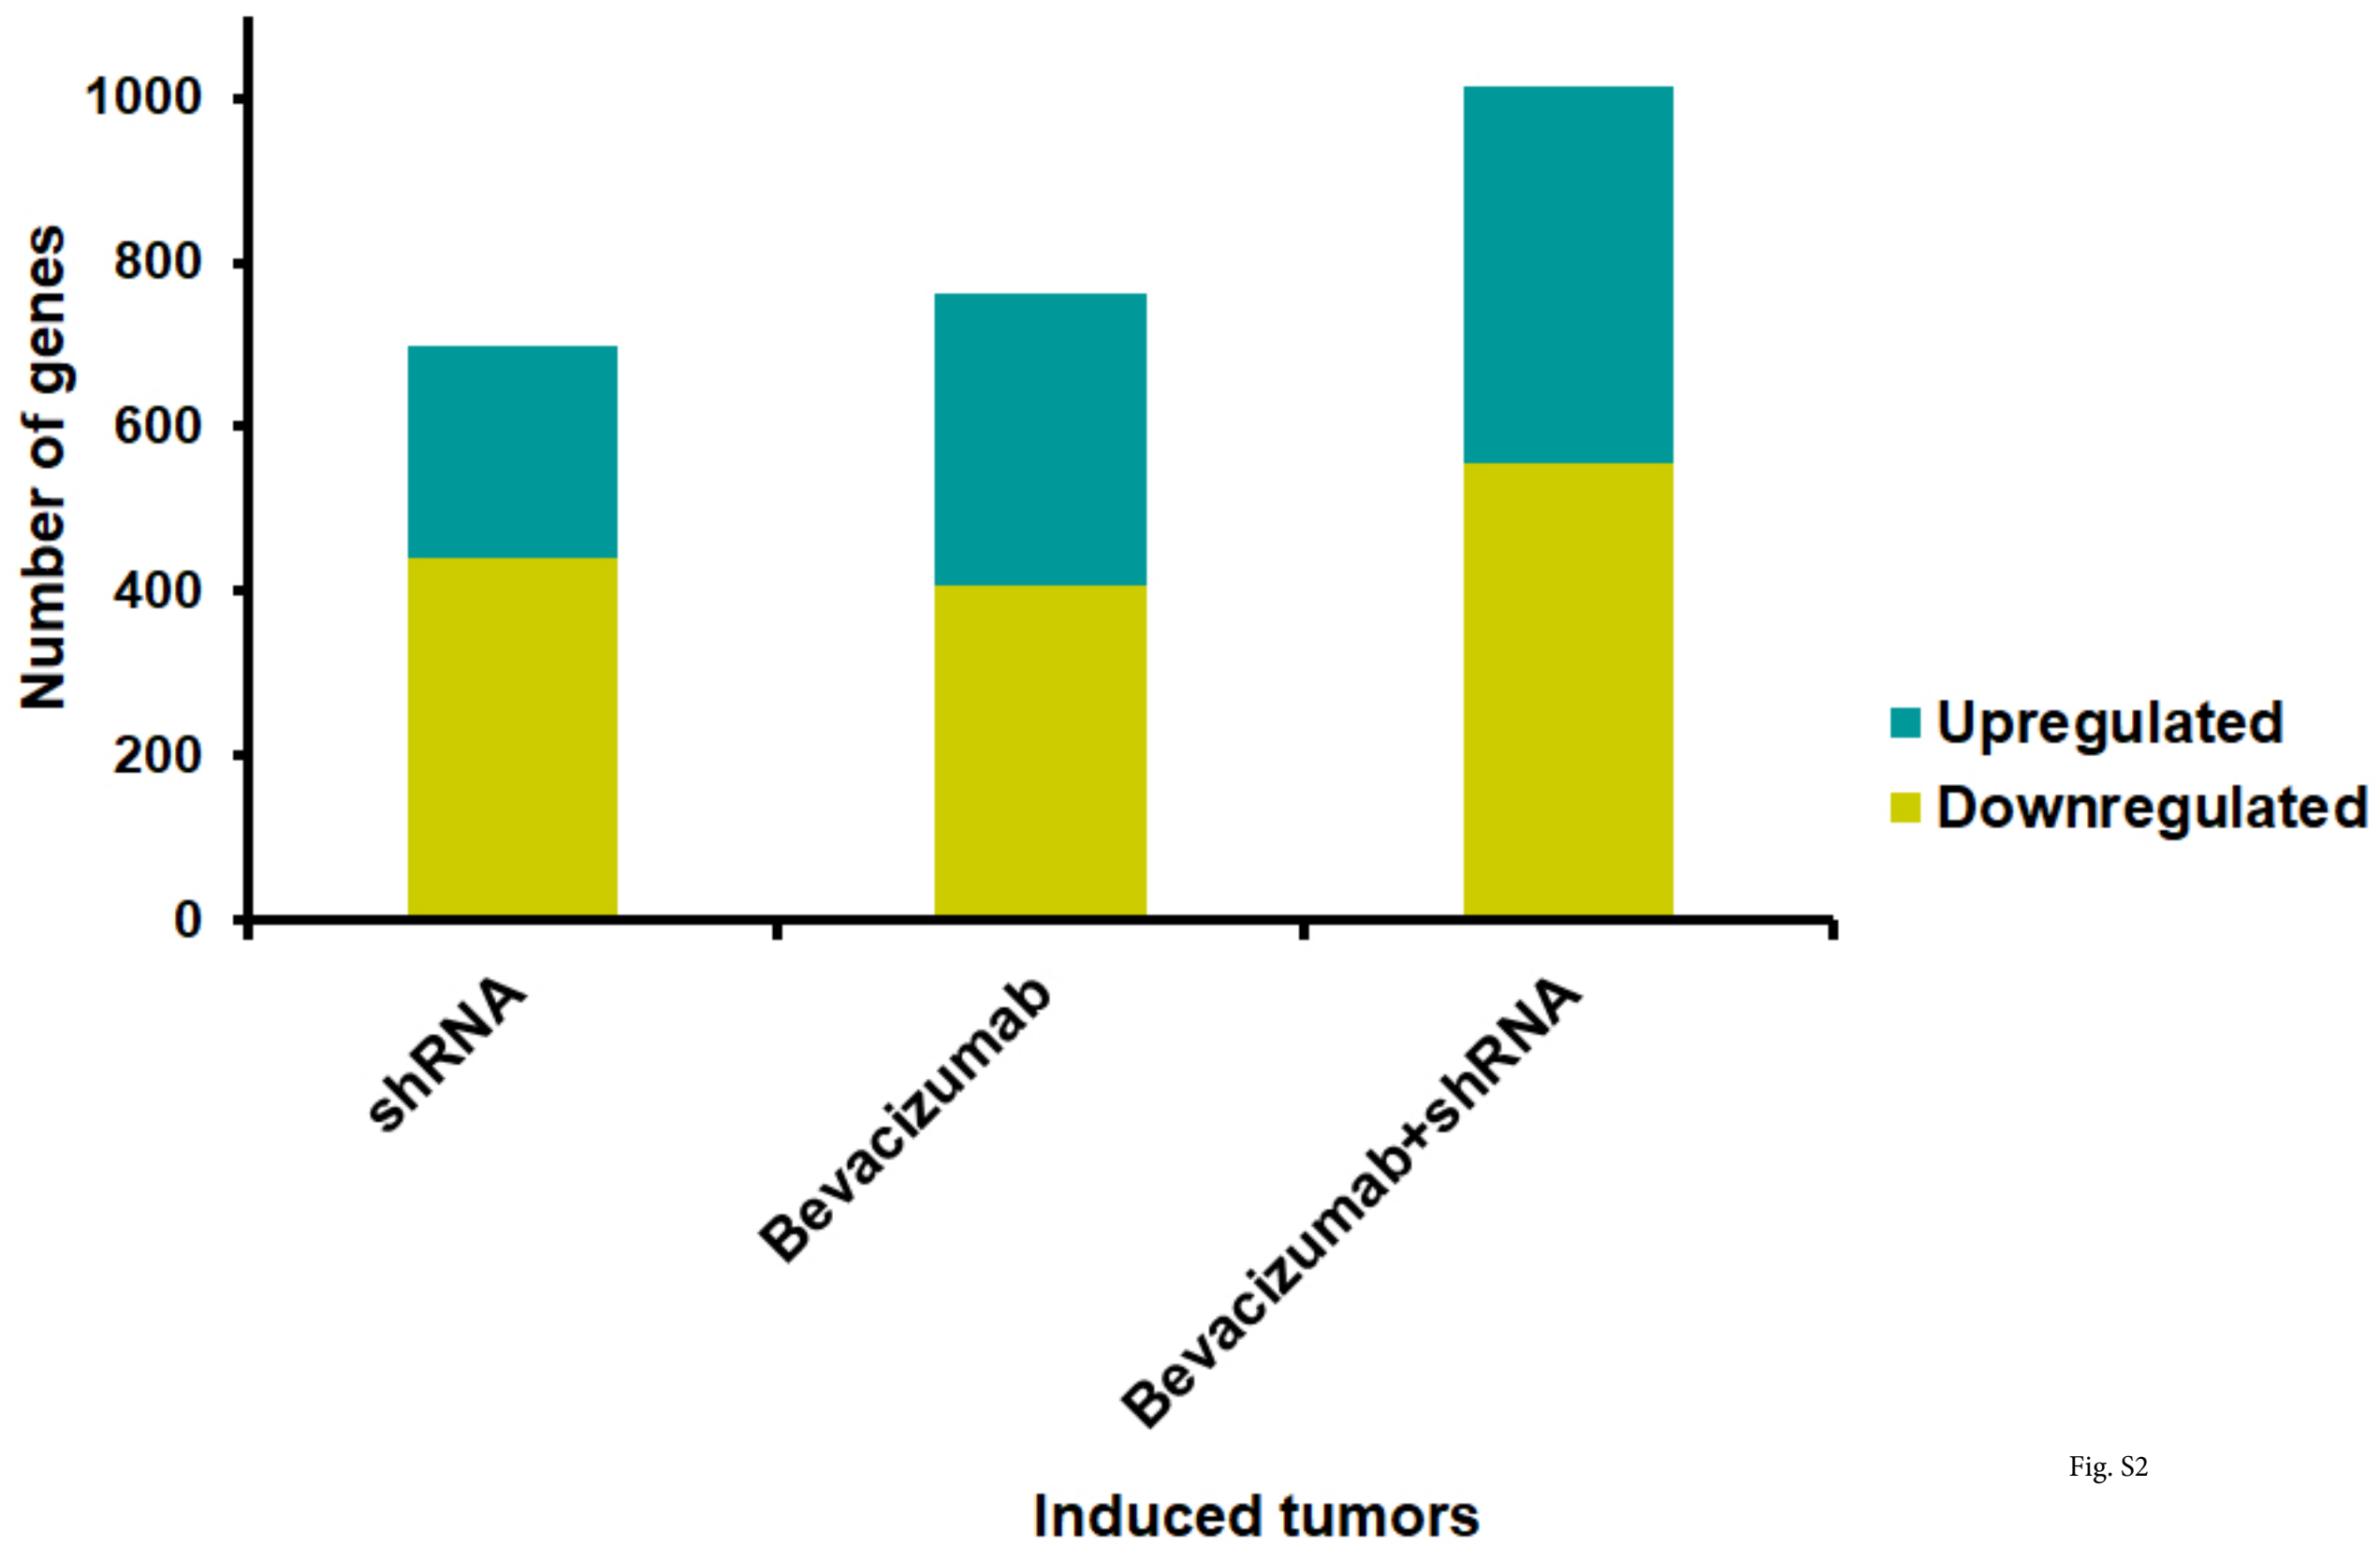

Fig. S2
