# Supplementary material for: The synergism of SMC1A cohesin gene silencing and bevacizumab against colorectal cancer
Source: PubMed Central journal article supplement (PMC10870497; doi:10.1186/s13046-024-02976-2), 2024-02-16
Supplement: 13046_2024_2976_MOESM6_ESM.pdf [file 13046_2024_2976_MOESM6_ESM.pdf]

Table S1. Primers sequences used for validating RNA-seq data by RT-qPCR

| Gene    | Forward primer sequence (5'-3') | Reverse primer sequence (5'-3') |
|---------|---------------------------------|---------------------------------|
| GRIN2C  | TCTTGAAGTACAAGGCCGGG            | GCGAGGTCAATCTGCCTCTT            |
| ZNF146  | GGCGCCAAAGTAGGAGACTT            | CATTCTTACCAGGCGTAGGCT           |
| ZFYVE28 | CAACTGCTGGCCAGTTCTA             | ACGGTCCTGAGGGATACT              |
| OLFML2A | CCCCTGTGAAACACCACAGT            | CACCAGGCTGTTCCGTAGT             |
| RGS9    | GAGTCGTGCACGTAGGAGAG            | CTAAAGCAATGTGGCTGGGC            |
| NAT9    | GAGTGACCACGCTAGGTCTG            | TGCTCCAGAAGCCACTGATG            |
| PTTG1IP | CCAGTTACAAGCGTCTTGCC            | CGCCTCAAAGTTCACCCAAC            |
| CARD9   | GAGGACCGGGAGAACACCA             | CCAGATTCCTCGTTCCAGGC            |
| TMEM87A | TTCCGATACCGTCGGGGAAA            | CAGCGCTTTTCAGATACCAGG           |
| FCGBP   | CTCCACAGTGCCAGGATGG             | ACCATGCCTTTACCCGCA              |
