# Supplementary material for: The synergism of SMC1A cohesin gene silencing and bevacizumab against colorectal cancer
Source: PubMed Central journal article supplement (PMC10870497; doi:10.1186/s13046-024-02976-2), 2024-02-16
Supplement: 13046_2024_2976_MOESM7_ESM.pdf [file 13046_2024_2976_MOESM7_ESM.pdf]

Table S2. Relative plating efficiency (RPE) of untreated, *SMC1A*-Ov and *SMC1A*-Kd cells.

| Samples   | RPE (%) |
|-----------|---------|
| Untreated | 98.7    |
| SMC1A-Ov  | 84.8    |
| SMC1A-Kd  | 49.4    |
