# Supplementary material for: The synergism of SMC1A cohesin gene silencing and bevacizumab against colorectal cancer
Source: PubMed Central journal article supplement (PMC10870497; doi:10.1186/s13046-024-02976-2), 2024-02-16
Supplement: 13046_2024_2976_MOESM8_ESM.pdf [file 13046_2024_2976_MOESM8_ESM.pdf]

Table S3. Pairwise comparison between SMC1A-ov, shRNA, bevacizumab and bevacizumab plus shRNA treatments

| Treatment           | SMC1A-Ov   |       |  | shRNA      |       |  | Bevacizumab |       |  | Bevacizumab + shRNA |       |  |
|---------------------|------------|-------|--|------------|-------|--|-------------|-------|--|---------------------|-------|--|
|                     | Chi-square | Sig.  |  | Chi-square | Sig.  |  | Chi-square  | Sig.  |  | Chi-square          | Sig.  |  |
| SMC1A-Ov            |            |       |  | 4.188      | 0.041 |  | 10.698      | 0.01  |  | 16.004              | 0.000 |  |
| shRNA               | 4.188      | 0.041 |  |            |       |  | 1.729       | 0.189 |  | 3.109               | 0.078 |  |
| Bevacizumab         | 10.698     | 0.01  |  | 1.729      | 0.189 |  |             |       |  | 0.192               | 0.661 |  |
| Bevacizumab + shRNA | 16.004     | 0.000 |  | 3.109      | 0.078 |  | 0.192       | 0.661 |  |                     |       |  |

Long rank  
(Mantel-Cox)
