# Supplementary material for: The synergism of SMC1A cohesin gene silencing and bevacizumab against colorectal cancer
Source: PubMed Central journal article supplement (PMC10870497; doi:10.1186/s13046-024-02976-2), 2024-02-16
Supplement: 13046_2024_2976_MOESM9_ESM.pdf [file 13046_2024_2976_MOESM9_ESM.pdf]

Table S4. Dysregulated genes (down- and upregulated) following shRNA treatment.

Downregulated

| <b>Gene</b>  | <b>log2FoldChange</b> |
|--------------|-----------------------|
| HIST1H2BM    | -4,11477E+14          |
| SNORD59B     | -4,0176E+14           |
| FLJ16779     | -4,00483E+14          |
| SNORA78      | -3,95946E+14          |
| INO80B       | -3,73441E+14          |
| RNF148       | -3,73007E+14          |
| CHGB         | -3,05517E+14          |
| LEAP2        | -2,77649E+14          |
| SNORD29      | -2,51124E+14          |
| SAA4         | -2,26661E+14          |
| PNLDC1       | -2,08259E+14          |
| C11orf94     | -2,04166E+14          |
| CARD9        | -1,98215E+14          |
| SBSN         | -1,97372E+14          |
| FOXL2NB      | -1,94827E+14          |
| SLFNL1       | -1,94686E+14          |
| LTC4S        | -1,85412E+14          |
| C7orf61      | -1,68945E+14          |
| C1orf220     | -1,5448E+14           |
| ABCA12       | -1,49177E+14          |
| AKAP5        | -1,32007E+14          |
| NKAPP1       | -1,2591E+14           |
| MFSD7        | -1,2565E+14           |
| PLAC8L1      | -1,2339E+14           |
| TERT         | -1,19723E+14          |
| GRIN2C       | -1,17271E+14          |
| SNORA9       | -1,13374E+14          |
| BHMG1        | -1,1158E+14           |
| ZNF577       | -1,09952E+14          |
| SNORD45C     | -1,08848E+14          |
| SERPINA3     | -1,08635E+14          |
| COX16        | -1,07392E+14          |
| BCYRN1       | -1,05077E+14          |
| ADAM8        | -1,02094E+14          |
| DRD4         | -1,00772E+14          |
| HIST1H3B     | -2,74164E+13          |
| PTGDS        | -1,673E+13            |
| CYP24A1      | -1,64803E+13          |
| LOC103908605 | -1,07604E+12          |
| CCDC106      | -0,970700418          |
| ZGLP1        | -0,970131094          |
| UBAP1L       | -0,939862967          |

|              |              |
|--------------|--------------|
| SNORD36A     | -0,934806384 |
| FERMT3       | -0,925623201 |
| KRTAP3-1     | -0,919502037 |
| C8orf76      | -0,910274566 |
| ZNF586       | -0,895944213 |
| LOC100506472 | -0,875723881 |
| CTRL         | -0,845975701 |
| LOC100130950 | -0,840921445 |
| DLGAP1-AS2   | -0,833860404 |
| AGER         | -0,831228444 |
| YJEFN3       | -0,824781323 |
| LAT          | -0,819261983 |
| EAF2         | -0,814340509 |
| RBBP8NL      | -0,801755447 |
| SLC25A25-AS1 | -0,785445569 |
| IRF2         | -0,783781235 |
| ANKRD13B     | -0,780339461 |
| GNB3         | -0,76236665  |
| GAL3ST4      | -0,755549437 |
| TMEM145      | -0,751039273 |
| AOC2         | -0,736854724 |
| SLC22A20     | -0,727292469 |
| PYGM         | -0,721746493 |
| HSPE1        | -0,719712363 |
| CNFN         | -0,719603083 |
| TNNI2        | -0,715789325 |
| FCGBP        | -0,674140129 |
| QTRT1        | -0,660904254 |
| CIRBP-AS1    | -0,660456221 |
| MAPK15       | -0,644956161 |
| SLC27A5      | -0,641802901 |
| MSX1         | -0,640162837 |
| MYH3         | -0,640111593 |
| AMH          | -0,627607353 |
| DDX12P       | -0,625230952 |
| PRRT3-AS1    | -0,624780793 |
| FKBP11       | -0,624390304 |
| NPW          | -0,624144544 |
| ERVMER34-1   | -0,611816709 |
| PRSS30P      | -0,606026257 |
| CKMT1B       | -0,599273105 |
| TAF10        | -0,588371622 |
| DOK3         | -0,585336934 |
| MAMDC4       | -0,583248895 |
| TAF1A        | -0,581677328 |
| TMEM86B      | -0,581257041 |
| DANCR        | -0,578839074 |

|         |              |
|---------|--------------|
| ADM5    | -0,571365336 |
| OBSL1   | -0,561091493 |
| CENPV   | -0,550442894 |
| NPR2    | -0,549985278 |
| SLC30A3 | -0,549064289 |
| RLTPR   | -0,543138046 |
| PADI3   | -0,537863135 |
| NME1    | -0,536028617 |
| COL7A1  | -0,533793885 |
| POLR3K  | -0,53211419  |
| NSUN5P1 | -0,52991639  |
| MCTS2P  | -0,529677494 |
| ZNF202  | -0,529567518 |
| APOO    | -0,528129192 |
| DUSP2   | -0,524289764 |
| KCND1   | -0,523077935 |
| PIDD1   | -0,522231152 |
| HSD11B2 | -0,520634825 |
| CHORDC1 | -0,519816223 |
| NUDT3   | -0,513272671 |
| ATP5G1  | -0,510685109 |
| MRM1    | -0,507507932 |
| PTGES   | -0,505781295 |
| GRAMD2  | -0,503378363 |
| RPIA    | -0,502330752 |
| DOC2A   | -0,500777088 |
| BRSK2   | -0,498742494 |
| FAM104B | -0,498290463 |
| HAUS7   | -0,497671837 |
| ANKLE1  | -0,492112761 |
| NOP16   | -0,491904288 |
| C5orf45 | -0,4917042   |
| ASRGL1  | -0,488387885 |
| SNHG20  | -0,488214201 |
| FANK1   | -0,487471272 |
| KAT2A   | -0,487238377 |
| SNRPE   | -0,481089448 |
| TARBP1  | -0,47743572  |
| PABPC1L | -0,475895967 |
| RAB26   | -0,475089168 |
| SRM     | -0,47407459  |
| CA5BP1  | -0,473811143 |
| CEBPD   | -0,473293733 |
| NPM3    | -0,470943855 |
| ATAD3B  | -0,469979362 |
| USP21   | -0,463752838 |
| LIAS    | -0,462592193 |

|           |              |
|-----------|--------------|
| TMEM97    | -0,461814815 |
| ITPKA     | -0,461396644 |
| ENGASE    | -0,460487534 |
| PIF1      | -0,4588464   |
| RRP8      | -0,456807355 |
| CCBL1     | -0,456563683 |
| THYN1     | -0,454288184 |
| MYC       | -0,453392824 |
| NENF      | -0,448101773 |
| NOP2      | -0,447348548 |
| ADAT3     | -0,447256392 |
| DNAJB1    | -0,44685757  |
| TRMU      | -0,44646841  |
| SNHG1     | -0,445991463 |
| TCOF1     | -0,444616844 |
| NAA16     | -0,444325223 |
| RELL2     | -0,443068394 |
| RSRP1     | -0,442565215 |
| EBPL      | -0,438601202 |
| SNRPD1    | -0,438331151 |
| TMEM216   | -0,433877084 |
| MRPS6     | -0,431144455 |
| TRMT1     | -0,42795174  |
| NOL12     | -0,424226918 |
| SERPINH1  | -0,423467351 |
| SSU72     | -0,42176313  |
| MANEAL    | -0,421434146 |
| C19orf44  | -0,421211656 |
| NDUFS5    | -0,420855451 |
| MARC1     | -0,420713462 |
| GAL       | -0,41987383  |
| BCCIP     | -0,417989552 |
| FAM86C2P  | -0,414885997 |
| MTERF3    | -0,413257556 |
| LUC7L     | -0,412746601 |
| ATP5D     | -0,411596069 |
| NOP56     | -0,411501387 |
| SLC5A6    | -0,411060552 |
| TMA7      | -0,408327662 |
| HEXDC     | -0,405648425 |
| BRX1      | -0,403566986 |
| ZMYND19   | -0,403349409 |
| NSDHL     | -0,402863144 |
| GALNT14   | -0,402192554 |
| OMA1      | -0,40153653  |
| NCBP2-AS2 | -0,400986139 |
| SLC25A33  | -0,400027239 |

|          |              |
|----------|--------------|
| APOBEC3F | -0,399451426 |
| POLR1C   | -0,398403418 |
| NDUFA3   | -0,396633983 |
| EXOSC8   | -0,396469589 |
| TRIB1    | -0,396184009 |
| SIX5     | -0,395607041 |
| WASH1    | -0,395416681 |
| GPATCH4  | -0,39533108  |
| PRDM15   | -0,395254027 |
| WDR3     | -0,395251308 |
| TMEM99   | -0,394550955 |
| PFAS     | -0,392973124 |
| DDX11    | -0,392925918 |
| NOL11    | -0,391684788 |
| LYAR     | -0,391203644 |
| NXF1     | -0,389836867 |
| UTP14A   | -0,389532755 |
| KCNC4    | -0,388863817 |
| LRP3     | -0,38851109  |
| TBC1D30  | -0,387789416 |
| RBMXL1   | -0,387082119 |
| NAT9     | -0,385925416 |
| RBM14    | -0,385650101 |
| BCS1L    | -0,38388934  |
| BANP     | -0,383471391 |
| NEURL4   | -0,379486238 |
| UQCR10   | -0,378556402 |
| TRAP1    | -0,378245912 |
| RNMTL1   | -0,376921214 |
| DPH2     | -0,376681636 |
| SLIRP    | -0,376369054 |
| KIAA0907 | -0,374552433 |
| CHEK2    | -0,374280431 |
| TEFM     | -0,374240103 |
| TMEM39A  | -0,374195148 |
| CDK10    | -0,371752955 |
| MRPL11   | -0,371467055 |
| EED      | -0,370944704 |
| SRSF7    | -0,36910516  |
| RRS1     | -0,368628171 |
| EXOSC3   | -0,367511877 |
| STIP1    | -0,365119057 |
| ESF1     | -0,365010077 |
| CPNE7    | -0,364732553 |
| CD3EAP   | -0,363793046 |
| INTS9    | -0,363663413 |
| TXNL4A   | -0,362527372 |

|          |              |
|----------|--------------|
| MRPL57   | -0,361913221 |
| KCNQ2    | -0,361774558 |
| EIF4A2   | -0,361760709 |
| FDFT1    | -0,360133    |
| RAD51C   | -0,357975951 |
| DDX31    | -0,35756906  |
| SNU13    | -0,356894358 |
| CLK2     | -0,356442772 |
| PNN      | -0,356108406 |
| FXN      | -0,355709887 |
| TONSL    | -0,355680463 |
| NGDN     | -0,354201628 |
| CTU2     | -0,352317568 |
| DHX37    | -0,351827905 |
| PRCC     | -0,351504569 |
| SNRPD2   | -0,35117109  |
| ORC5     | -0,350771638 |
| LDHB     | -0,35001565  |
| WRAP73   | -0,349250123 |
| EMC9     | -0,349067376 |
| LOC90784 | -0,348197737 |
| TRPM2    | -0,346843957 |
| MAT2A    | -0,346520898 |
| CCDC86   | -0,345985872 |
| PSMG1    | -0,342940475 |
| SNHG12   | -0,342813476 |
| PTRH2    | -0,342426956 |
| PRPF38B  | -0,341768575 |
| IGFBP2   | -0,341735544 |
| CNOT4    | -0,3410138   |
| MND1     | -0,340582186 |
| ZC3HC1   | -0,339990411 |
| HMGCS1   | -0,339414689 |
| INTS3    | -0,339309347 |
| HIBCH    | -0,338291853 |
| WDR74    | -0,33727365  |
| DESI1    | -0,335171252 |
| PRPF38A  | -0,33419005  |
| LUC7L3   | -0,334173467 |
| RABEPK   | -0,33384134  |
| PGAM5    | -0,332777514 |
| EIF3I    | -0,33252813  |
| CCNE1    | -0,332180866 |
| PINX1    | -0,331504078 |
| TBCCD1   | -0,331253242 |
| GNG5     | -0,33068837  |
| TIMM21   | -0,330448996 |

|         |              |
|---------|--------------|
| NDUFA2  | -0,329731574 |
| RIOK2   | -0,329703667 |
| SPG21   | -0,329422486 |
| MALSU1  | -0,328904409 |
| JTB     | -0,328784942 |
| ALG6    | -0,327852883 |
| C1QBP   | -0,327599901 |
| NDUFAF2 | -0,327332015 |
| FDXR    | -0,327250507 |
| TIMM44  | -0,325894586 |
| PARP2   | -0,325507402 |
| NOP58   | -0,32407512  |
| C10orf2 | -0,323042052 |
| GLRX5   | -0,322581763 |
| NDUFAF4 | -0,321841772 |
| DNAAF2  | -0,32168929  |
| LYRM1   | -0,320460559 |
| SMO     | -0,32040054  |
| TOMM5   | -0,319792991 |
| ODC1    | -0,319418201 |
| PGP     | -0,31912912  |
| CCT8    | -0,319046757 |
| PA2G4   | -0,318477488 |
| DNAJA4  | -0,318239769 |
| ZNF146  | -0,317785536 |
| CEBPZ   | -0,317209983 |
| UQCR11  | -0,317085884 |
| GNL3    | -0,315528159 |
| NARFL   | -0,315412229 |
| ACAT2   | -0,315229244 |
| STX10   | -0,315074985 |
| PROSC   | -0,314972019 |
| WDR75   | -0,314737022 |
| CACYBP  | -0,314625211 |
| NOL6    | -0,3143831   |
| JMJD6   | -0,314222872 |
| IPO4    | -0,311334368 |
| SRRT    | -0,310900726 |
| DHCR7   | -0,310899508 |
| MICALL2 | -0,310816768 |
| IMP4    | -0,310179689 |
| DNAJC7  | -0,310036867 |
| SAMD1   | -0,309053342 |
| CCDC137 | -0,308665632 |
| THOP1   | -0,307753884 |
| ALKBH1  | -0,307637059 |
| TOMM40  | -0,307214244 |

|           |              |
|-----------|--------------|
| TUFM      | -0,30698408  |
| PPRC1     | -0,306531399 |
| MRPL18    | -0,305339403 |
| EIF5B     | -0,305046749 |
| CXXC1     | -0,304519762 |
| ONECUT3   | -0,302887421 |
| C11orf84  | -0,301447857 |
| CDC6      | -0,301432422 |
| STOML2    | -0,300942237 |
| HDDC2     | -0,299996333 |
| L3MBTL2   | -0,299512929 |
| ING5      | -0,298516814 |
| PRMT7     | -0,298166432 |
| EYA3      | -0,297735951 |
| RECQL4    | -0,296885472 |
| B4GALNT4  | -0,296311508 |
| PDCD11    | -0,295677848 |
| LIF       | -0,294665165 |
| KRI1      | -0,294070597 |
| NOP14     | -0,293816177 |
| FEN1      | -0,292178043 |
| RRP9      | -0,291623231 |
| SBK1      | -0,291468283 |
| CCT7      | -0,289572905 |
| NT5C3B    | -0,289562419 |
| NOL10     | -0,289525816 |
| C9orf114  | -0,287571469 |
| POLR3H    | -0,286764406 |
| KIAA0020  | -0,286631795 |
| NAT10     | -0,286624468 |
| EIF3L     | -0,286153182 |
| NIFK      | -0,285874928 |
| LRWD1     | -0,284640628 |
| UCK2      | -0,284195297 |
| SFT2D1    | -0,283993697 |
| YBX1      | -0,283917844 |
| ABCA7     | -0,282556442 |
| MRPS25    | -0,282037754 |
| DPH7      | -0,280657108 |
| UTP11L    | -0,280572758 |
| SSB       | -0,279673282 |
| GMNN      | -0,279633331 |
| LINC01234 | -0,279082916 |
| COPS5     | -0,279049803 |
| ADAM19    | -0,278743597 |
| CAD       | -0,278003088 |
| DHX30     | -0,277532261 |



|          |              |
|----------|--------------|
| SRSF1    | -0,277240418 |
| ATG4B    | -0,277224147 |
| HSPA4    | -0,276926654 |
| QTRTD1   | -0,27562368  |
| CCAR2    | -0,275603428 |
| DNAAF5   | -0,274752602 |
| RUVBL1   | -0,274115794 |
| PDCD2    | -0,273378191 |
| NUDC     | -0,273002687 |
| CHAF1B   | -0,273002496 |
| NOC2L    | -0,272747124 |
| ACIN1    | -0,270880814 |
| SLC26A6  | -0,270782346 |
| GGCX     | -0,270376034 |
| NUDT9    | -0,269715551 |
| MRPS27   | -0,269699753 |
| FASN     | -0,269567087 |
| CWC27    | -0,269345317 |
| PRPF3    | -0,26870036  |
| PIM3     | -0,268469781 |
| MRRF     | -0,268429593 |
| RRP12    | -0,268042968 |
| IDI1     | -0,267849368 |
| ZC3H15   | -0,267504262 |
| MRPS22   | -0,267285917 |
| EIF3M    | -0,266336747 |
| EIF3E    | -0,266305181 |
| KARS     | -0,266105648 |
| QSOX2    | -0,265023374 |
| PTDSS2   | -0,264727393 |
| HSPA8    | -0,2630223   |
| TCP1     | -0,262588964 |
| RAE1     | -0,262476636 |
| HSP90AB1 | -0,260986221 |
| CCT4     | -0,26025128  |
| AUP1     | -0,2586203   |
| PCID2    | -0,257886281 |
| AEN      | -0,257530533 |
| BOD1     | -0,257219506 |
| SUPV3L1  | -0,256303551 |
| PPT1     | -0,251205614 |
| ALDH1B1  | -0,250329822 |
| YBX3     | -0,250325351 |
| BUD13    | -0,24650496  |
| RPAP1    | -0,246110254 |
| SF3B3    | -0,245483071 |
| ELAVL1   | -0,240972607 |

|         |              |
|---------|--------------|
| POLR3D  | -0,236840111 |
| ZDHHC6  | -0,236732126 |
| GTPBP4  | -0,23493437  |
| SDCCAG3 | -0,233968796 |
| DNAJA3  | -0,233257952 |
| NCS1    | -0,232824551 |
| SRSF3   | -0,231835446 |
| HNRNPH3 | -0,231437853 |
| DNAJC11 | -0,23062857  |
| FARSB   | -0,229193207 |
| LEO1    | -0,227964488 |
| PALD1   | -0,223599006 |
| HSPA9   | -0,2235798   |
| CHTOP   | -0,222013758 |
| NUDT5   | -0,221371551 |
| USP19   | -0,214312539 |
| SDHD    | -0,211272912 |
| CCT2    | -0,211231555 |
| DUSP5   | -0,20728355  |
| LSG1    | -0,206863613 |
| CCT5    | -0,200766357 |
| NUP62   | -0,198870232 |
| CCT6A   | -0,191280975 |
| SNX5    | -0,180153834 |

#### Upregulated

| Gene     | log2FoldChange |
|----------|----------------|
| MEF2D    | 0,19414497     |
| BCL2L13  | 0,20964503     |
| TRAM2    | 0,21695979     |
| OXSRI    | 0,22118065     |
| KIAA1161 | 0,22728809     |
| KCTD10   | 0,2277952      |
| ITM2B    | 0,2286459      |
| CAPN5    | 0,2442188      |
| ZRANB1   | 0,250842       |
| RGS3     | 0,26778879     |
| LRRC16A  | 0,26979619     |
| TK2      | 0,27067193     |
| ALAD     | 0,27211703     |
| DHX32    | 0,27362498     |
| ELMSAN1  | 0,27588285     |
| UNKL     | 0,27884197     |
| IDS      | 0,28262424     |
| HERPUD2  | 0,28306251     |
| KIAA0513 | 0,28475205     |

|         |            |
|---------|------------|
| MYO1D   | 0,28665381 |
| SWAP70  | 0,28812815 |
| CXorf38 | 0,29105453 |
| RNF185  | 0,29606445 |
| MXRA7   | 0,29613127 |
| RASA3   | 0,29619564 |
| SMARCA1 | 0,29701907 |
| TMCO3   | 0,29709512 |
| GRAMD3  | 0,29846902 |
| FAM3C   | 0,30135206 |
| SFXN3   | 0,30257936 |
| ALDH3B1 | 0,30274681 |
| HERC3   | 0,30392421 |
| PQLC3   | 0,30561292 |
| PDK1    | 0,30657925 |
| RIPK4   | 0,31331316 |
| TAP2    | 0,31394892 |
| NIPAL3  | 0,31605936 |
| SMAD7   | 0,31654188 |
| VGLL4   | 0,31787209 |
| USP43   | 0,31838032 |
| DPYSL2  | 0,31878967 |
| SERINC3 | 0,32000128 |
| CAST    | 0,32113992 |
| TMEM19  | 0,32219532 |
| PPP2R3C | 0,32508342 |
| SHTN1   | 0,32544492 |
| SCN5A   | 0,32715334 |
| SNX33   | 0,32978427 |
| PLEKHA2 | 0,33371221 |
| MYO18A  | 0,33479739 |
| STK17A  | 0,33538158 |
| NCEH1   | 0,33677048 |
| WAC-AS1 | 0,33731948 |
| SLC35A5 | 0,34000486 |
| SLC20A2 | 0,34017631 |
| DDX58   | 0,34061536 |
| REEP1   | 0,34095756 |
| SPTBN1  | 0,34128115 |
| KCTD9   | 0,34152348 |
| ZNF185  | 0,34206735 |
| TMEM87A | 0,34277345 |
| MACF1   | 0,3429262  |
| MARCH8  | 0,34756776 |
| SRD5A3  | 0,34801978 |
| MFSD9   | 0,34948585 |
| SLC1A1  | 0,3516059  |

|           |            |
|-----------|------------|
| ABHD2     | 0,35206418 |
| L1CAM     | 0,35609474 |
| DTX3L     | 0,35782693 |
| FAM110C   | 0,35881059 |
| KLF10     | 0,35919753 |
| PAPSS2    | 0,35973195 |
| ATF1      | 0,36375404 |
| CCDC69    | 0,36414511 |
| PREX1     | 0,36422554 |
| CCDC82    | 0,36502084 |
| MFSD6     | 0,36528904 |
| LIMA1     | 0,36530001 |
| DNAJC22   | 0,36874634 |
| BACE1     | 0,37083871 |
| ALS2      | 0,37396551 |
| ZNF362    | 0,37482963 |
| PROS1     | 0,37570915 |
| B3GNT7    | 0,37576089 |
| ZFYVE1    | 0,3765615  |
| B2M       | 0,37679201 |
| GNAZ      | 0,3819054  |
| STYK1     | 0,38527658 |
| ITGA3     | 0,38673804 |
| TMEM87B   | 0,38678482 |
| PRKCA     | 0,38684017 |
| PQBP-1    | 0,38798102 |
| HBP1      | 0,38825455 |
| DNAJB5    | 0,38874167 |
| UBXN2A    | 0,38949092 |
| CAV2      | 0,39040415 |
| SEPP1     | 0,3915233  |
| MTMR10    | 0,39214929 |
| RAB11FIP5 | 0,39252353 |
| RELL1     | 0,39282997 |
| TPPP      | 0,39316081 |
| ITGB1     | 0,39628822 |
| SLC24A1   | 0,39802865 |
| OLFML2A   | 0,39896924 |
| APH1B     | 0,39943059 |
| BBS4      | 0,39950735 |
| LAMB1     | 0,40281688 |
| CYS1      | 0,40319524 |
| PTP4A3    | 0,40473199 |
| CCNG2     | 0,40475181 |
| DTWD2     | 0,40602733 |
| NDRG1     | 0,40752412 |
| ZMYM5     | 0,4082403  |

|          |            |
|----------|------------|
| KNDC1    | 0,40872455 |
| PARP9    | 0,41028603 |
| PI4K2B   | 0,41240862 |
| SUSD1    | 0,41365634 |
| RASSF2   | 0,41498601 |
| DUSP10   | 0,41542135 |
| RASSF5   | 0,41597414 |
| CA13     | 0,41907982 |
| CLUAP1   | 0,42112168 |
| PPP1R3B  | 0,42192195 |
| PNPLA8   | 0,42197784 |
| XPA      | 0,42223689 |
| LMO7     | 0,4255061  |
| RPS6KA2  | 0,42591468 |
| BCAP29   | 0,42617259 |
| TC2N     | 0,43140821 |
| SCAPER   | 0,4340962  |
| RASSF4   | 0,43489116 |
| SP110    | 0,43676086 |
| YPEL5    | 0,43734126 |
| GPR155   | 0,43818936 |
| LAMP2    | 0,44185012 |
| LZTS1    | 0,44195908 |
| NAT1     | 0,44214121 |
| CYP4V2   | 0,44543746 |
| ARL6IP5  | 0,44694594 |
| ZNF365   | 0,44811612 |
| GSKIP    | 0,44863878 |
| MCAM     | 0,44881173 |
| ERMAP    | 0,44947842 |
| PCDHGA10 | 0,44973224 |
| KIF3C    | 0,45073302 |
| SLC6A6   | 0,45205349 |
| SLC26A2  | 0,45253088 |
| GAB2     | 0,45283449 |
| GGACT    | 0,45515684 |
| ATL3     | 0,4564146  |
| KIF13B   | 0,45704892 |
| TESK2    | 0,45834809 |
| GPR39    | 0,46107295 |
| RAPGEF2  | 0,46137749 |
| SYNPO    | 0,46185123 |
| SLC25A16 | 0,4626291  |
| DOK7     | 0,46400525 |
| PLEKHF2  | 0,46895705 |
| CLCN4    | 0,46895912 |
| PTPN21   | 0,46915028 |

|            |            |
|------------|------------|
| NUDT12     | 0,47250806 |
| IL17RD     | 0,47265323 |
| SLC41A2    | 0,47364905 |
| ARL4C      | 0,47459226 |
| CTSO       | 0,47546752 |
| ACBD5      | 0,47643724 |
| CDC42EP3   | 0,47684129 |
| IL15       | 0,48136131 |
| MYOM3      | 0,48230352 |
| CLIP4      | 0,48266549 |
| WDR66      | 0,48522301 |
| NEK7       | 0,48529804 |
| CPEB4      | 0,48566264 |
| TP53INP1   | 0,48588888 |
| ASAP2      | 0,49140472 |
| PTTG1IP    | 0,49515526 |
| C10orf32   | 0,49624591 |
| ENPP5      | 0,49795651 |
| ST6GALNAC2 | 0,49805023 |
| SMARCA2    | 0,49898223 |
| STX11      | 0,49923425 |
| PCMTD1     | 0,50117193 |
| F3         | 0,5016778  |
| ZNF516     | 0,50286504 |
| PTCH1      | 0,50302063 |
| PSD4       | 0,50565787 |
| SLC35E3    | 0,50855688 |
| SMIM14     | 0,51534204 |
| MYT1       | 0,51582205 |
| ANTXR2     | 0,52056511 |
| LPCAT2     | 0,52165192 |
| PTPRN2     | 0,52435809 |
| CREBRF     | 0,5251249  |
| KIAA1217   | 0,52547589 |
| GLIPR1     | 0,52597832 |
| TANC2      | 0,52884422 |
| CD24       | 0,53192057 |
| MRC2       | 0,53278805 |
| SOWAHB     | 0,53421114 |
| GPR37      | 0,53720969 |
| KLF12      | 0,53793134 |
| KAT2B      | 0,53989225 |
| GPR162     | 0,54612549 |
| ELL2       | 0,55420548 |
| ALCAM      | 0,55610067 |
| SMPDL3A    | 0,55751349 |
| KRCC1      | 0,55927878 |

|            |            |
|------------|------------|
| ACVRL1     | 0,56058104 |
| ARHGEF37   | 0,5609561  |
| ABCA3      | 0,56544021 |
| TIAM2      | 0,56557213 |
| ST6GALNAC5 | 0,5657198  |
| TMEM55A    | 0,56679297 |
| SYNE3      | 0,569299   |
| CCDC68     | 0,57004232 |
| LIMCH1     | 0,57594281 |
| WASL       | 0,57610688 |
| PAQR8      | 0,58377882 |
| CYP4F11    | 0,58913018 |
| IRS2       | 0,59569627 |
| RBM43      | 0,59888499 |
| NATD1      | 0,6095357  |
| GPRIN2     | 0,60974722 |
| CSF1R      | 0,61432133 |
| TENM3      | 0,61602275 |
| FSCN2      | 0,61848003 |
| SLC4A8     | 0,61871908 |
| CD274      | 0,6208826  |
| PPM1K      | 0,62647367 |
| CLCN1      | 0,62730766 |
| CYP4F3     | 0,63111083 |
| CCNJL      | 0,63439343 |
| MGC50722   | 0,63793632 |
| PNMA2      | 0,64169695 |
| ENC1       | 0,64436955 |
| GOLGA8N    | 0,64728029 |
| WDR72      | 0,64805585 |
| TMEM56     | 0,64944716 |
| TCAF2      | 0,64984656 |
| MMRN2      | 0,65000832 |
| MLLT3      | 0,65038906 |
| PAG1       | 0,65557868 |
| MICALCL    | 0,657025   |
| SERPING1   | 0,65829288 |
| BHLHE41    | 0,66082619 |
| FZD7       | 0,66364273 |
| KCNIP3     | 0,67118826 |
| MAML3      | 0,67995771 |
| REEP2      | 0,68120964 |
| RUNX2      | 0,68356575 |
| ZFYVE28    | 0,68760902 |
| MMP28      | 0,69100361 |
| GRIK2      | 0,77620171 |
| EVI2B      | 1,0918E+14 |

|        |            |
|--------|------------|
| GPR176 | 0,94355539 |
|--------|------------|
