# Supplementary material for: The synergism of SMC1A cohesin gene silencing and bevacizumab against colorectal cancer
Source: PubMed Central journal article supplement (PMC10870497; doi:10.1186/s13046-024-02976-2), 2024-02-16
Supplement: 13046_2024_2976_MOESM10_ESM.pdf [file 13046_2024_2976_MOESM10_ESM.pdf]

Table S5. Dysregulated genes (down- and upregulated) following bevacizumab treatment.

Downregulated

| <b>Gene</b> | <b>log2FoldChange</b> |
|-------------|-----------------------|
| CSF3        | -5,91239E+14          |
| PLA2G4E     | -5,69514E+14          |
| S100A9      | -5,56181E+14          |
| IL17C       | -5,2276E+14           |
| CFTR        | -5,08472E+14          |
| IL1B        | -5,00805E+14          |
| LRRC55      | -4,8999E+14           |
| C1orf127    | -4,66273E+14          |
| PIK3R6      | -4,51555E+14          |
| MGC32805    | -4,39935E+14          |
| SELENBP1    | -4,38274E+14          |
| SPRR2A      | -4,30409E+14          |
| IL22RA2     | -4,24646E+14          |
| PAEP        | -4,13194E+14          |
| SPRR2D      | -3,93983E+14          |
| ADGRG3      | -3,92451E+14          |
| GP6         | -3,91603E+14          |
| SNCAIP      | -3,91161E+14          |
| C15orf48    | -3,85162E+14          |
| LTB         | -3,65827E+14          |
| PI3         | -3,57983E+14          |
| S100P       | -3,50914E+14          |
| GRHL3       | -3,44101E+14          |
| LTA         | -3,34144E+14          |
| LEAP2       | -3,0653E+14           |
| WFDC21P     | -2,97808E+14          |
| KYNU        | -2,89739E+14          |
| PABPN1L     | -2,80307E+14          |
| PILRA       | -2,79644E+14          |
| BDKRB1      | -2,78535E+14          |
| GNRH2       | -2,75399E+14          |
| CIITA       | -2,70594E+14          |
| ZNF763      | -2,67019E+14          |
| CD74        | -2,51711E+14          |
| JAKMIP2-AS1 | -2,4679E+14           |
| CYP24A1     | -2,4626E+14           |
| SAA1        | -2,43801E+14          |
| FOXL2NB     | -2,33138E+14          |
| ASB2        | -2,31141E+14          |
| SAA2        | -2,27877E+14          |
| ADGRF1      | -2,20135E+14          |
| MEFV        | -2,14204E+14          |
| KRT23       | -2,1E+14              |

|              |              |
|--------------|--------------|
| CYP3A5       | -2,08278E+14 |
| CDIPT-AS1    | -2,08036E+14 |
| CFB          | -2,04355E+14 |
| TWIST2       | -1,96559E+14 |
| SNORD28      | -1,90317E+14 |
| TNFSF14      | -1,90033E+14 |
| KLRC3        | -1,88629E+14 |
| ANKRD31      | -1,87561E+14 |
| LRG1         | -1,86403E+14 |
| CXCL8        | -1,85685E+14 |
| ZC3H12A      | -1,84218E+14 |
| SEN3-EIF4A1  | -1,81689E+14 |
| CCL28        | -1,8056E+14  |
| SBSN         | -1,79326E+14 |
| CPAMD8       | -1,78504E+14 |
| RTCA-AS1     | -1,72584E+14 |
| C2orf66      | -1,70634E+14 |
| POM121L9P    | -1,70133E+14 |
| OTUD7A       | -1,64869E+14 |
| VNN1         | -1,64137E+14 |
| KLRC2        | -1,59436E+14 |
| CARD9        | -1,59138E+14 |
| NCF4         | -1,55592E+14 |
| SMIM22       | -1,52201E+14 |
| C5           | -1,51152E+14 |
| LYZ          | -1,4694E+14  |
| ABCA12       | -1,44923E+14 |
| NFKBIZ       | -1,44726E+14 |
| IL32         | -1,41491E+14 |
| GBP2         | -1,4146E+14  |
| C2           | -1,41389E+14 |
| FAXDC2       | -1,39072E+14 |
| LOC100506124 | -1,38803E+14 |
| SSSCA1-AS1   | -1,38357E+14 |
| LOC100506472 | -1,32533E+14 |
| SOD2         | -1,31909E+14 |
| SNORA9       | -1,28784E+14 |
| SPATA6L      | -1,27352E+14 |
| LY6D         | -1,26337E+14 |
| SEMA4A       | -1,26161E+14 |
| NTRK1        | -1,22989E+14 |
| ALDH1A3      | -1,22572E+14 |
| SLC16A6      | -1,21575E+14 |
| LOC102723927 | -1,2123E+14  |
| TMPRSS13     | -1,18901E+14 |
| GPM6B        | -1,18781E+14 |
| SNORD14E     | -1,18571E+14 |

|              |              |
|--------------|--------------|
| ROCK1P1      | -1,18255E+14 |
| LOC100130705 | -1,13146E+14 |
| ZNF577       | -1,1191E+14  |
| UBAP1L       | -1,09456E+14 |
| LINC01468    | -1,0717E+14  |
| TNFAIP2      | -1,06099E+14 |
| TEX14        | -1,0529E+14  |
| KRTAP3-1     | -1,02532E+14 |
| GRIN2C       | -1,0231E+14  |
| FCGBP        | -1,00793E+14 |
| ACRBP        | -1,00786E+14 |
| TNFAIP6      | -4,43629E+13 |
| MIR3189      | -4,0931E+13  |
| C10orf62     | -3,99083E+13 |
| C1QTNF1-AS1  | -3,66738E+13 |
| GSAP         | -2,33409E+13 |
| RASD1        | -2,06698E+13 |
| EHF          | -1,99866E+13 |
| PPAP2B       | -1,7555E+13  |
| SNORD55      | -1,30639E+12 |
| AKAP5        | -0,996643118 |
| MAP3K8       | -0,994331262 |
| DNAH17       | -0,991613434 |
| BASP1        | -0,978795494 |
| ADAM8        | -0,977621989 |
| ADGRV1       | -0,968620309 |
| NAPSA        | -0,943166709 |
| LOC389602    | -0,942713574 |
| NOD2         | -0,934084826 |
| CASP10       | -0,927868123 |
| ZGLP1        | -0,924438581 |
| GDF15        | -0,913600025 |
| ATAD3C       | -0,898562124 |
| FBXL19-AS1   | -0,897859058 |
| GPR35        | -0,889540015 |
| PLIN4        | -0,874521155 |
| YJEFN3       | -0,866988414 |
| TFPI         | -0,864661237 |
| LOC101929125 | -0,864287897 |
| SAT1         | -0,857596179 |
| GSTM2        | -0,857236885 |
| LOC101929709 | -0,84972993  |
| CEACAM19     | -0,835098482 |
| NPIP15       | -0,829122141 |
| GNB3         | -0,811726286 |
| SCARF1       | -0,801885763 |
| AGER         | -0,8002498   |

|              |              |
|--------------|--------------|
| MST1P2       | -0,797118905 |
| IFNGR1       | -0,794457065 |
| MYH3         | -0,79182765  |
| NLGN3        | -0,775983091 |
| NR4A2        | -0,774368479 |
| SPIN2B       | -0,763761835 |
| LTB4R        | -0,755084632 |
| DDN          | -0,74469673  |
| C9orf16      | -0,740424787 |
| CSTB         | -0,733599858 |
| OGDHL        | -0,723429277 |
| GDPD3        | -0,720523996 |
| APOO         | -0,708619558 |
| LINC01012    | -0,706281765 |
| LOC100133091 | -0,704462732 |
| ZC3H12C      | -0,70408092  |
| CSAD         | -0,696180845 |
| SEMA6A       | -0,686283579 |
| ZDHHC11      | -0,684436649 |
| SNHG10       | -0,681426966 |
| LUCAT1       | -0,678658396 |
| PRKXP1       | -0,6728843   |
| LINC01089    | -0,672655163 |
| TMEM145      | -0,668972894 |
| NFATC4       | -0,66008135  |
| DUSP16       | -0,658597247 |
| SCO2         | -0,656000077 |
| TMEM132A     | -0,651295845 |
| DNAH17-AS1   | -0,648169709 |
| SLC11A2      | -0,644511706 |
| CFAP53       | -0,642084207 |
| RAPGEFL1     | -0,641747302 |
| NAA16        | -0,63864455  |
| LOC613037    | -0,632645161 |
| QTRT1        | -0,632391395 |
| AHSA2        | -0,631470552 |
| RHBDL1       | -0,63143341  |
| OVGPI        | -0,626858198 |
| SLC12A2      | -0,625754056 |
| SLC43A2      | -0,625442624 |
| ZNF692       | -0,620398226 |
| RELL2        | -0,618426588 |
| RNF207       | -0,618219236 |
| MAPK15       | -0,615577483 |
| CCAT1        | -0,614926623 |
| TNFAIP3      | -0,607957721 |
| RRAD         | -0,603211751 |

|           |              |
|-----------|--------------|
| RSRP1     | -0,584405238 |
| PPARGC1B  | -0,581902853 |
| SEC31B    | -0,579447923 |
| AIFM3     | -0,572478288 |
| PRDM15    | -0,571808301 |
| COL7A1    | -0,570343643 |
| RPL32P3   | -0,569491007 |
| ARV1      | -0,562317096 |
| DUSP2     | -0,561880785 |
| NPR2      | -0,561249513 |
| CKMT1B    | -0,561245984 |
| TARBP1    | -0,560966635 |
| TRAF1     | -0,559884033 |
| PABPC1L   | -0,558740019 |
| IGSF9     | -0,556291196 |
| FAM227A   | -0,555873934 |
| NFIA      | -0,55576979  |
| TFRC      | -0,554170078 |
| ASNS      | -0,552517686 |
| SNHG3     | -0,552502178 |
| SCNN1D    | -0,549518682 |
| ADGRE2    | -0,544587053 |
| AREG      | -0,527174007 |
| AMH       | -0,522922765 |
| STK19     | -0,522359904 |
| ZNF239    | -0,516942806 |
| NSUN5P2   | -0,515279417 |
| TMEM99    | -0,510556503 |
| VDR       | -0,508971686 |
| TRMT11    | -0,50799819  |
| KLHL17    | -0,507512617 |
| ATP6V1C2  | -0,50572016  |
| DDX12P    | -0,503753896 |
| EREG      | -0,503489009 |
| CLDN15    | -0,503407821 |
| TMEM198B  | -0,501997237 |
| RIT1      | -0,501891979 |
| KANSL1L   | -0,501040768 |
| SNHG4     | -0,498444554 |
| TRPV1     | -0,49781502  |
| DNHD1     | -0,497586177 |
| ANKRD19P  | -0,49610187  |
| RBMXL1    | -0,493328626 |
| NIPBL-AS1 | -0,493323209 |
| LYN       | -0,492428653 |
| BBC3      | -0,491956836 |
| CXCL16    | -0,490232957 |

|            |              |
|------------|--------------|
| FOXD4      | -0,49020235  |
| OR51B5     | -0,486693479 |
| LYRM1      | -0,481393185 |
| SLC25A37   | -0,480835933 |
| PAXIP1-AS1 | -0,475305089 |
| KCNK5      | -0,473790218 |
| KLHL15     | -0,467638191 |
| CPNE7      | -0,465636349 |
| ZNF202     | -0,462996943 |
| C5orf45    | -0,457832882 |
| MYC        | -0,453122875 |
| FDXACB1    | -0,449850965 |
| GUSBP11    | -0,449096133 |
| MTRR       | -0,44842949  |
| SLCO4A1    | -0,44826565  |
| LDHB       | -0,445447243 |
| CYP27B1    | -0,438314782 |
| HOXC9      | -0,435778688 |
| GOLGA8B    | -0,430493953 |
| PP7080     | -0,42992198  |
| PCBP1-AS1  | -0,429696073 |
| LIAS       | -0,429464172 |
| GTF2IP20   | -0,429258095 |
| DRAM1      | -0,425546948 |
| RNPC3      | -0,420421544 |
| SYS1       | -0,41975208  |
| NFKB2      | -0,418650931 |
| POLR1B     | -0,417614973 |
| ATP5G1     | -0,417311854 |
| PIDD1      | -0,413413554 |
| SLC4A11    | -0,412521008 |
| AHI1       | -0,411551972 |
| RPL11      | -0,411440475 |
| RPIA       | -0,407329739 |
| DNAH14     | -0,406050384 |
| FKBP14     | -0,405869975 |
| HERC2P2    | -0,405365996 |
| LINC00641  | -0,405353333 |
| RLTPR      | -0,401602996 |
| FAM206A    | -0,399532362 |
| CLK4       | -0,398306419 |
| USP21      | -0,396791736 |
| RILPL2     | -0,395016669 |
| WDR3       | -0,39462511  |
| ZNF276     | -0,391146966 |
| C10orf2    | -0,390515866 |
| SLC18B1    | -0,389955809 |

|          |              |
|----------|--------------|
| ESF1     | -0,389698608 |
| DHX34    | -0,389342684 |
| PRPF38B  | -0,388096466 |
| SNHG1    | -0,388033814 |
| SNAPC4   | -0,387755775 |
| PCCA     | -0,387367934 |
| RRP8     | -0,385557793 |
| FAM155B  | -0,38550039  |
| GDAP1    | -0,385287102 |
| CCDC57   | -0,385261615 |
| TBPL1    | -0,384031728 |
| PHF14    | -0,381229222 |
| BTG2     | -0,380852439 |
| PLXNB1   | -0,379545701 |
| TJP3     | -0,378968053 |
| PDXDC2P  | -0,378865226 |
| NOP16    | -0,375254196 |
| LETMD1   | -0,374968313 |
| DNAAF2   | -0,374853469 |
| PSTPIP2  | -0,374018904 |
| APOBEC3F | -0,373450953 |
| DFFB     | -0,373015337 |
| DCUN1D3  | -0,371695246 |
| KPTN     | -0,369180681 |
| PUS1     | -0,367420014 |
| HEXDC    | -0,366796536 |
| NAT9     | -0,366593522 |
| PDE7A    | -0,365668662 |
| PUS3     | -0,36553163  |
| EBPL     | -0,365150158 |
| KAT2A    | -0,36287739  |
| WRAP73   | -0,361497505 |
| NFKB1    | -0,360762849 |
| RPAIN    | -0,360293322 |
| ORC5     | -0,36013104  |
| HSPD1    | -0,357405255 |
| RPS25    | -0,356562117 |
| MIR100HG | -0,355175984 |
| TXNL4B   | -0,355119713 |
| ALKBH1   | -0,354233192 |
| SLC17A9  | -0,353752348 |
| UFC1     | -0,352971374 |
| CLK2     | -0,352581101 |
| ZNF271P  | -0,352490749 |
| TMEM39A  | -0,350599521 |
| DNAJC2   | -0,349106782 |
| SKIV2L   | -0,345803074 |

|              |              |
|--------------|--------------|
| RIOK2        | -0,345691772 |
| KCNQ2        | -0,345146292 |
| C1orf109     | -0,344817969 |
| NOP2         | -0,343442024 |
| SYT7         | -0,343438526 |
| MARC1        | -0,343342036 |
| C9orf91      | -0,342917612 |
| NKRF         | -0,341931076 |
| USF1         | -0,34145022  |
| MOGS         | -0,341229528 |
| GCH1         | -0,339087215 |
| C1orf52      | -0,336299045 |
| NEURL4       | -0,332442063 |
| DDX10        | -0,332210836 |
| SFXN4        | -0,330832922 |
| MRRF         | -0,328650734 |
| ADAT2        | -0,326779609 |
| PNN          | -0,325083577 |
| NXF1         | -0,324437098 |
| GUF1         | -0,323213018 |
| LOC90784     | -0,322585507 |
| C3orf62      | -0,319439655 |
| HDDC2        | -0,317961051 |
| MRPS25       | -0,315672502 |
| MTERF3       | -0,313188222 |
| BCCIP        | -0,312154246 |
| CBWD5        | -0,308686716 |
| MARS2        | -0,307880338 |
| ARL14EP      | -0,307296685 |
| SNRPE        | -0,30560956  |
| THYN1        | -0,304242244 |
| NOL6         | -0,300379713 |
| NOL10        | -0,297980961 |
| NFKBIB       | -0,297252177 |
| PFAS         | -0,29709256  |
| ACTR5        | -0,296540466 |
| TRAP1        | -0,295587063 |
| E2F4         | -0,295247387 |
| ING5         | -0,292499657 |
| COA4         | -0,292122977 |
| MAP2K3       | -0,289752704 |
| RPS18        | -0,288393694 |
| LOC100506548 | -0,288145332 |
| KIAA1147     | -0,287797492 |
| MCCC1        | -0,287481401 |
| STX16        | -0,286966118 |
| NARFL        | -0,285868122 |



|          |              |
|----------|--------------|
| CYB5D1   | -0,285094908 |
| WDR75    | -0,284805797 |
| NDUFS5   | -0,283370424 |
| GBA2     | -0,282862646 |
| INTS10   | -0,27931461  |
| MAT2A    | -0,278593888 |
| SLC5A6   | -0,277149454 |
| SPATA2   | -0,276850962 |
| DDX31    | -0,276533957 |
| QSOX2    | -0,27591126  |
| ZNF384   | -0,275374748 |
| RIOK1    | -0,275314992 |
| MAP3K13  | -0,275129431 |
| SLC35E2B | -0,274922628 |
| ZMYND8   | -0,272448381 |
| FASTKD5  | -0,267052641 |
| PPP1R10  | -0,266398107 |
| ZDHHC6   | -0,264170865 |
| CNPY2    | -0,258386411 |
| EIF3I    | -0,258142793 |
| ZNF251   | -0,258139733 |
| MTIF2    | -0,256968223 |
| PRCC     | -0,256009247 |
| RAP1GAP2 | -0,255812782 |
| VPS45    | -0,25175989  |
| ZNF131   | -0,250281214 |
| ORC2     | -0,245358972 |
| MCCC2    | -0,238176324 |
| SDHD     | -0,227445097 |
| PNISR    | -0,224383571 |
| OGT      | -0,215733928 |
| ZNF317   | -0,201884023 |
| RBM25    | -0,189399799 |
| CCNL1    | -0,184729885 |

#### Upregulated

| <b>Gene</b> | <b>log2FoldChange</b> |
|-------------|-----------------------|
| ZNF146      | 0,111017115           |
| DNAJC5      | 0,186629514           |
| ARPC5       | 0,189119697           |
| GNB1        | 0,196360402           |
| IDS         | 0,197082191           |
| SEPT9       | 0,202739677           |
| ILK         | 0,207375849           |
| CALM1       | 0,208475082           |
| DCAF6       | 0,210991088           |

|          |             |
|----------|-------------|
| PRMT2    | 0,212379539 |
| PRPSAP1  | 0,215865234 |
| USP4     | 0,217857283 |
| ADD1     | 0,217956411 |
| MAD1L1   | 0,220450921 |
| WDR1     | 0,223963425 |
| PLS3     | 0,227490185 |
| TPM3     | 0,232135565 |
| HERPUD2  | 0,233027494 |
| CLIC1    | 0,233242119 |
| NCK2     | 0,233950802 |
| KCTD5    | 0,234391807 |
| SH3BP5L  | 0,235277592 |
| FNBP1    | 0,235770555 |
| TMCC1    | 0,238048314 |
| SDC3     | 0,238568822 |
| ZFYVE21  | 0,239278668 |
| TRIP10   | 0,239518236 |
| MAP4     | 0,242800165 |
| TRAM2    | 0,243821376 |
| OXSR1    | 0,245993415 |
| PCYT1A   | 0,24648055  |
| TUBB6    | 0,246622969 |
| NAGA     | 0,247350052 |
| PITRM1   | 0,249994436 |
| C12orf75 | 0,255100827 |
| MAPKAPK3 | 0,255808066 |
| KIF1C    | 0,256830947 |
| PKM      | 0,258221937 |
| RASA3    | 0,258914058 |
| SRD5A1   | 0,261308906 |
| ATP6V1E1 | 0,262411562 |
| MSN      | 0,262512012 |
| TPGS2    | 0,264349667 |
| RHEB     | 0,266298007 |
| EZR      | 0,266760914 |
| STXBP1   | 0,267986252 |
| SHANK3   | 0,268985955 |
| DRAP1    | 0,269159476 |
| SHTN1    | 0,269237582 |
| SPSB1    | 0,271108914 |
| PREP     | 0,275314374 |
| KIAA1161 | 0,276985204 |
| INF2     | 0,279231021 |
| CD9      | 0,28066067  |
| RHOC     | 0,281510944 |
| EIF4EBP1 | 0,281808445 |

|          |             |
|----------|-------------|
| GNAI2    | 0,283235235 |
| MYL12A   | 0,284823558 |
| ITGB5    | 0,285331514 |
| SKA2     | 0,28540712  |
| BCL2L1   | 0,286942888 |
| FAM3C    | 0,287359476 |
| GNB5     | 0,289381925 |
| MSANTD3  | 0,290514078 |
| ARPIN    | 0,290655713 |
| GLUL     | 0,293851745 |
| ANXA2    | 0,294481548 |
| DBNL     | 0,294484805 |
| RTN4     | 0,295462162 |
| TMEM19   | 0,296258725 |
| MYO1D    | 0,297519489 |
| CTSV     | 0,298230104 |
| KLF6     | 0,298621993 |
| ARL6IP5  | 0,301392854 |
| SUN1     | 0,301642371 |
| KLC1     | 0,302118626 |
| BAIAP2   | 0,310273638 |
| GPC1     | 0,312230543 |
| CPNE2    | 0,312685402 |
| RAC2     | 0,314578554 |
| CYTH3    | 0,315199921 |
| RAP1GDS1 | 0,31572497  |
| DMTN     | 0,316099787 |
| TMEM55A  | 0,316878886 |
| CALM2    | 0,317532816 |
| MVP      | 0,317664117 |
| TMEM87A  | 0,318610777 |
| ITPR3    | 0,318932189 |
| SYDE1    | 0,320216026 |
| MTL5     | 0,32079582  |
| CHST7    | 0,321794443 |
| PACSIN2  | 0,321880276 |
| EMP3     | 0,321942001 |
| INADL    | 0,322877476 |
| CAST     | 0,324582609 |
| DNAJC22  | 0,324798533 |
| PRRG4    | 0,330453727 |
| BAIAP3   | 0,331152154 |
| FAM64A   | 0,331784155 |
| PARVA    | 0,332190369 |
| TES      | 0,333521446 |
| GSN      | 0,33421221  |
| CAV2     | 0,334335848 |

|           |             |
|-----------|-------------|
| VGLL4     | 0,33507229  |
| KRT8      | 0,33529587  |
| ADGRE5    | 0,336101998 |
| PCTP      | 0,336432082 |
| SKAP1     | 0,33648612  |
| UBXN2A    | 0,337382962 |
| PPP1R26   | 0,337557218 |
| NFIX      | 0,341335298 |
| ABHD2     | 0,348683462 |
| PQLC3     | 0,348997981 |
| GPR161    | 0,349397853 |
| AIG1      | 0,353650382 |
| CD99      | 0,353929671 |
| LINC00152 | 0,353964774 |
| PBX3      | 0,356177422 |
| PXDC1     | 0,356273931 |
| FXYD5     | 0,356753762 |
| COL6A2    | 0,357079751 |
| TCP11L1   | 0,357386523 |
| NOP14-AS1 | 0,359373409 |
| TMEM245   | 0,360540652 |
| TGFA      | 0,360813488 |
| PLA2G15   | 0,360879002 |
| C11orf68  | 0,362495965 |
| PLEC      | 0,362797253 |
| RNF115    | 0,363105987 |
| SHB       | 0,363250959 |
| SPTBN1    | 0,365351957 |
| LTBP2     | 0,365550484 |
| ZNF385A   | 0,366457492 |
| GAS2L1    | 0,369459989 |
| SLC35E4   | 0,369712052 |
| MXRA7     | 0,370245371 |
| HES2      | 0,370424275 |
| TLDC1     | 0,371513804 |
| TUBB4A    | 0,371971504 |
| CTH       | 0,372801207 |
| PROSER2   | 0,372848089 |
| LRRC8A    | 0,375708879 |
| ENOX1     | 0,377046419 |
| SRPX      | 0,377560507 |
| MYADM     | 0,377640254 |
| RAB11FIP5 | 0,380675227 |
| SMAD7     | 0,382092518 |
| ARHGAP21  | 0,384299928 |
| MPP1      | 0,384559745 |
| COCH      | 0,385336772 |

|          |             |
|----------|-------------|
| MYO18A   | 0,385910598 |
| PHTF1    | 0,386391314 |
| SRRM3    | 0,388649361 |
| SEC14L1  | 0,388971603 |
| PIM1     | 0,388978413 |
| MICALL1  | 0,389290036 |
| PLEKHA6  | 0,390361695 |
| KLC3     | 0,395256593 |
| LASP1    | 0,396050709 |
| CHRD     | 0,396435297 |
| KIF13B   | 0,397689739 |
| LMNA     | 0,401653205 |
| LIMCH1   | 0,402783682 |
| ALS2     | 0,40709087  |
| RRBP1    | 0,407457013 |
| SH3BP4   | 0,407681055 |
| TTC7A    | 0,409597138 |
| CDKN2B   | 0,410507204 |
| SNX25    | 0,411342414 |
| RASA1    | 0,413035434 |
| GLIS3    | 0,414463899 |
| ESPN     | 0,41509297  |
| GGACT    | 0,41537295  |
| FLNA     | 0,415829173 |
| BCAR3    | 0,415892359 |
| ERBB2IP  | 0,416235779 |
| LATS2    | 0,417865533 |
| TPPP     | 0,420523621 |
| SHANK2   | 0,427074279 |
| RIPK4    | 0,430918252 |
| PMP22    | 0,431344299 |
| ATL3     | 0,431694688 |
| OSBPL10  | 0,434533822 |
| CRIP1    | 0,435949513 |
| CTDSPL   | 0,436158921 |
| NES      | 0,437038199 |
| TANC2    | 0,438639824 |
| NDRG1    | 0,441411606 |
| CMTM7    | 0,446294713 |
| TRIM6    | 0,447369101 |
| LRRC37B  | 0,447493111 |
| C1orf116 | 0,448736198 |
| SLC44A3  | 0,449214467 |
| SERPINB5 | 0,45271562  |
| ALDH3B1  | 0,453708197 |
| NWD1     | 0,45411053  |
| KNDC1    | 0,454802098 |

|          |             |
|----------|-------------|
| EBF4     | 0,454983477 |
| TMEM107  | 0,456750518 |
| MYH9     | 0,458719727 |
| ZNF185   | 0,459874254 |
| RGS14    | 0,461275374 |
| AMOTL2   | 0,46129003  |
| SRD5A3   | 0,465815422 |
| TUBA1A   | 0,466998638 |
| KIF12    | 0,467212907 |
| UBALD2   | 0,467675975 |
| PAPSS2   | 0,467980848 |
| MLPH     | 0,468403503 |
| CUL4B    | 0,474620606 |
| RGMA     | 0,47690837  |
| AAMDC    | 0,477340504 |
| FGFR3    | 0,477479361 |
| LPCAT2   | 0,477496837 |
| COL13A1  | 0,478869499 |
| S100A10  | 0,478925116 |
| L1CAM    | 0,479094919 |
| ELL2     | 0,479625458 |
| TGFBR1   | 0,479864784 |
| AMDHD1   | 0,486266996 |
| TIMP2    | 0,487630045 |
| ZNF680   | 0,48784239  |
| FHL1     | 0,487852065 |
| CDKN2D   | 0,487915366 |
| PRKCA    | 0,492919472 |
| CCDC68   | 0,493754377 |
| CDC42BPA | 0,494881397 |
| GOLIM4   | 0,499258342 |
| CLIC3    | 0,499826597 |
| KHDC1L   | 0,5043815   |
| PDGFC    | 0,506547327 |
| SYNPO    | 0,506570504 |
| UACA     | 0,50885558  |
| REEP1    | 0,510596056 |
| PTTG1IP  | 0,51121399  |
| ENDOD1   | 0,51229827  |
| LGALS1   | 0,518495485 |
| LIMS2    | 0,526290876 |
| FGD1     | 0,528055832 |
| WDR66    | 0,529005889 |
| IL17RD   | 0,531237463 |
| CSPG4    | 0,533380027 |
| COL12A1  | 0,534139093 |
| OGFRL1   | 0,536168301 |

|            |             |
|------------|-------------|
| ARHGEF26   | 0,539151091 |
| ABCA3      | 0,539664176 |
| HTR1D      | 0,539817935 |
| HR         | 0,540326455 |
| TBC1D2     | 0,540419536 |
| OLFML2B    | 0,541238837 |
| STIM1      | 0,542288611 |
| SH3TC2     | 0,543938195 |
| PTPRN2     | 0,54436926  |
| RASSF6     | 0,545884689 |
| GAS6       | 0,547206748 |
| GAB2       | 0,547846896 |
| RASSF2     | 0,54790959  |
| OLFML2A    | 0,556560069 |
| CTNNAL1    | 0,556726669 |
| CLIP4      | 0,557189415 |
| CD22       | 0,558765881 |
| ST6GALNAC2 | 0,560699018 |
| HCFC1R1    | 0,560826846 |
| LYPD6      | 0,565276924 |
| CNN3       | 0,567486569 |
| PDLIM2     | 0,571294537 |
| C1QL4      | 0,584921015 |
| ALCAM      | 0,586531408 |
| PADI2      | 0,58961707  |
| MAP2       | 0,5898618   |
| ABLIM3     | 0,592873534 |
| SMARCA2    | 0,59291364  |
| CRIP2      | 0,593391616 |
| STARD5     | 0,594820517 |
| TMEM173    | 0,595959661 |
| GLI2       | 0,598851426 |
| ANXA2P2    | 0,599643602 |
| CDC42EP3   | 0,60178134  |
| PRICKLE1   | 0,611753015 |
| SYNC       | 0,614271956 |
| FAM46C     | 0,615962397 |
| ZFYVE28    | 0,616745519 |
| TINCR      | 0,618122915 |
| CLCN1      | 0,622289526 |
| PLK2       | 0,625698715 |
| BVES       | 0,626338317 |
| ARL4D      | 0,630327137 |
| PRKCDBP    | 0,638770738 |
| ANTXR2     | 0,645682183 |
| KAT2B      | 0,645776784 |
| FKBP1B     | 0,64709175  |

|              |             |
|--------------|-------------|
| TMEM255B     | 0,650139991 |
| AFAP1L1      | 0,65204678  |
| TAB3         | 0,659505291 |
| TGFB1I1      | 0,660707673 |
| LOC100507002 | 0,668038508 |
| ASAP2        | 0,670462583 |
| BHLHE40-AS1  | 0,691569906 |
| MGLL         | 0,694642694 |
| CGB8         | 0,695619144 |
| GNG13        | 0,703584181 |
| ROR1         | 0,707061328 |
| USH1G        | 0,710083213 |
| LOC102724279 | 0,727295203 |
| CCNJL        | 0,733235601 |
| TIAM2        | 0,740712539 |
| ECM1         | 0,74967465  |
| MBNL3        | 0,75143721  |
| MCAM         | 0,755805567 |
| TENM3        | 0,756956655 |
| TLN2         | 0,759387826 |
| ITGB4        | 0,766731937 |
| CST6         | 0,770852971 |
| SUSD4        | 0,771035054 |
| LYPD1        | 0,772051159 |
| S100A2       | 0,774745453 |
| YBX2         | 0,790131808 |
| NTN4         | 0,791937484 |
| FAM129A      | 0,796877862 |
| NEDD9        | 0,79811786  |
| ST6GALNAC5   | 0,800114141 |
| CSF1R        | 0,801671826 |
| NOS1AP       | 0,802395259 |
| RGS9         | 0,811531978 |
| INHBB        | 0,840231196 |
| GPR176       | 0,844753831 |
| TMEM200A     | 0,853734888 |
| SLC9A9       | 0,899910011 |
| FBP1         | 0,901127619 |
| EVI2B        | 0,902948722 |
| DLK2         | 0,913400796 |
| ENC1         | 0,914228611 |
| NKX3-2       | 0,92346269  |
| SERPINE1     | 0,933604272 |
| JMJD1C-AS1   | 0,953589348 |
| HEG1         | 0,971801843 |
| DENND2A      | 1,25248E+12 |
| GRIK2        | 1,07244E+13 |



|           |             |
|-----------|-------------|
| KRT86     | 1,55485E+13 |
| TCN2      | 1,00047E+14 |
| CYP4F11   | 1,00848E+14 |
| RUNX2     | 1,08511E+14 |
| COL15A1   | 1,08868E+14 |
| MAMDC2    | 1,14689E+14 |
| WNT5B     | 1,17133E+14 |
| LCTL      | 1,17682E+14 |
| PI16      | 1,18279E+14 |
| EMILIN1   | 1,24787E+14 |
| SERTAD4   | 1,3839E+14  |
| CADM1     | 1,44702E+14 |
| PRSS23    | 1,48775E+14 |
| CTSE      | 1,63138E+14 |
| CXCR3     | 1,70358E+14 |
| KRT81     | 1,72713E+14 |
| LINC01605 | 1,97619E+14 |
| SND1-IT1  | 2,71459E+14 |
