# Supplementary material for: The synergism of SMC1A cohesin gene silencing and bevacizumab against colorectal cancer
Source: PubMed Central journal article supplement (PMC10870497; doi:10.1186/s13046-024-02976-2), 2024-02-16
Supplement: 13046_2024_2976_MOESM11_ESM.pdf [file 13046_2024_2976_MOESM11_ESM.pdf]

Table S6. Common dysregulated genes between PRJNA635121 bioproject and our bevacizumab-treated tumors.

| <b>Gene</b> | <b>PRJNA635121<br/>(log2FoldChange)</b> | <b>This work<br/>(log2FoldChange)</b> |
|-------------|-----------------------------------------|---------------------------------------|
| SAA2        | -2,9891E+14                             | -2,27877E+14                          |
| SAA1        | -2,5861E+14                             | -2,43801E+14                          |
| HTR1D       | -1,9803E+14                             | 0,539817935                           |
| FAM206A     | -0,60420457                             | -0,399532362                          |
| PDLIM2      | 0,710350376                             | 0,571294537                           |
| CLIP4       | 0,791467406                             | 0,557189415                           |
| RASSF2      | 0,812101076                             | 0,54790959                            |
| NFATC4      | 0,920511086                             | -0,66008135                           |
| PILRA       | 0,948482232                             | -2,79644E+14                          |
| CHRD        | 0,980201032                             | 0,396435297                           |
| INHBB       | 0,987665463                             | 0,840231196                           |
| EBF4        | 1,0333E+14                              | 0,454983477                           |
| SLC16A6     | 1,03884E+14                             | -1,21575E+14                          |
| LTB         | 1,15961E+14                             | -3,65827E+14                          |
| GSTM2       | 1,26209E+14                             | -0,857236885                          |
| POM121L9P   | 1,37693E+14                             | -1,70133E+14                          |
