# Supplementary material for: The synergism of SMC1A cohesin gene silencing and bevacizumab against colorectal cancer
Source: PubMed Central journal article supplement (PMC10870497; doi:10.1186/s13046-024-02976-2), 2024-02-16
Supplement: 13046_2024_2976_MOESM12_ESM.pdf [file 13046_2024_2976_MOESM12_ESM.pdf]

Table S7. Dysregulated genes (down- and upregulated) following bevacizumab plus shRNA treatment.

Downregulated

| <b>Gene</b>  | <b>log2FoldChange</b> |
|--------------|-----------------------|
| S100A9       | -5,02029E+14          |
| CFTR         | -4,97802E+14          |
| LINC01126    | -4,9728E+14           |
| SPRR2E       | -4,83884E+14          |
| PLA2G4E      | -4,66298E+14          |
| IL1B         | -4,65491E+14          |
| CRABP1       | -4,27273E+14          |
| ALK          | -4,23782E+14          |
| SPRR2A       | -4,23471E+14          |
| C1orf127     | -4,2285E+14           |
| AANAT        | -4,18288E+14          |
| PLA2R1       | -4,09692E+14          |
| ZNF606       | -4,05375E+14          |
| RNF148       | -4,03043E+14          |
| LRRC55       | -3,89021E+14          |
| C15orf48     | -3,73878E+14          |
| LTA          | -3,54182E+14          |
| SFTPD        | -3,503E+14            |
| EDAR         | -3,43388E+14          |
| NRG1         | -3,41039E+14          |
| BNC2         | -3,397E+14            |
| TNFAIP6      | -3,2551E+14           |
| PI3          | -3,17218E+14          |
| SMIM10       | -3,0744E+14           |
| KY           | -2,97464E+14          |
| HIST1H3B     | -2,79615E+14          |
| S100P        | -2,7551E+14           |
| PDZRN3       | -2,75112E+14          |
| CIITA        | -2,73797E+14          |
| PKNOX2       | -2,72102E+14          |
| LOX          | -2,6661E+14           |
| AFAP1-AS1    | -2,64813E+14          |
| PCDH12       | -2,61366E+14          |
| GREM2        | -2,59158E+14          |
| MARCH1       | -2,54907E+14          |
| SULF1        | -2,53112E+14          |
| PRKCB        | -2,50392E+14          |
| KRT23        | -2,47464E+14          |
| SAA2         | -2,35959E+14          |
| AEBP1        | -2,32071E+14          |
| LOC101928100 | -2,20024E+14          |
| DNAAF1       | -2,09085E+14          |

|            |              |
|------------|--------------|
| ADGRF1     | -2,06112E+14 |
| ALDH3B2    | -1,99459E+14 |
| SFRP1      | -1,95702E+14 |
| PILRA      | -1,94482E+14 |
| CYP3A5     | -1,93702E+14 |
| SBSN       | -1,90825E+14 |
| ABCA1      | -1,90513E+14 |
| COL3A1     | -1,84462E+14 |
| NOVA1      | -1,8029E+14  |
| ASB2       | -1,76235E+14 |
| CPAMD8     | -1,74608E+14 |
| SIRPB2     | -1,72641E+14 |
| UNC13A     | -1,68813E+14 |
| CARD9      | -1,65686E+14 |
| ABCA12     | -1,65653E+14 |
| ZEB2       | -1,65046E+14 |
| DDR2       | -1,6388E+14  |
| FAM83A     | -1,63204E+14 |
| DMD        | -1,58937E+14 |
| CXCL8      | -1,55015E+14 |
| SLPI       | -1,54906E+14 |
| KLHDC7B    | -1,54516E+14 |
| CELF2      | -1,53472E+14 |
| ELMO1      | -1,51332E+14 |
| GRIA3      | -1,4957E+14  |
| RUNX1T1    | -1,4601E+14  |
| TBX15      | -1,4518E+14  |
| KCNQ5      | -1,33678E+14 |
| C2         | -1,32041E+14 |
| CASP1      | -1,30809E+14 |
| PLCG1-AS1  | -1,29896E+14 |
| POM121L9P  | -1,29664E+14 |
| KLRC3      | -1,29073E+14 |
| SPATA6L    | -1,28005E+14 |
| KLRC2      | -1,27545E+14 |
| SNORD55    | -1,27326E+14 |
| FGF2       | -1,27103E+14 |
| AMN        | -1,2586E+14  |
| XDH        | -1,25792E+14 |
| ROS1       | -1,2543E+14  |
| POU2F2     | -1,2456E+14  |
| BMP5       | -1,22494E+14 |
| CSGALNACT1 | -1,21636E+14 |
| LY6D       | -1,21295E+14 |
| NCR3LG1    | -1,20722E+14 |
| PTPRB      | -1,158E+14   |
| BASP1      | -1,15531E+14 |

|           |              |
|-----------|--------------|
| SNORA9    | -1,1532E+14  |
| CXCL14    | -1,13432E+14 |
| FILIP1L   | -1,1204E+14  |
| POF1B     | -1,10791E+14 |
| AKT3      | -1,09233E+14 |
| MMP2      | -1,09052E+14 |
| SLC16A6   | -1,0847E+14  |
| TAPBPL    | -1,07687E+14 |
| SNORD74   | -1,06796E+14 |
| PTENP1    | -1,0568E+14  |
| EBLN2     | -1,05509E+14 |
| GRIN2C    | -1,04937E+14 |
| GPR35     | -1,04852E+14 |
| TCF4      | -1,04532E+14 |
| LOC389602 | -1,03018E+14 |
| FHDC1     | -1,02289E+14 |
| LINC00944 | -1,01808E+14 |
| LINC01397 | -3,93422E+13 |
| WFDC21P   | -2,92563E+13 |
| SFRP2     | -2,45747E+13 |
| RASD1     | -2,42321E+13 |
| TRPS1     | -1,9562E+13  |
| TNFSF14   | -1,66474E+13 |
| IL32      | -1,65112E+13 |
| CDSN      | -1,38317E+13 |
| C3        | -1,38207E+13 |
| KCNK12    | -1,27982E+13 |
| C1QTNF1   | -1,26187E+13 |
| EPS8L3    | -1,25882E+13 |
| TMPRSS13  | -1,05779E+13 |
| IL17C     | -43512380532 |
| AZGP1     | -0,975679062 |
| TERT      | -0,961879622 |
| TRIM22    | -0,9437211   |
| ADGRV1    | -0,934687782 |
| IL23A     | -0,933821468 |
| HAL       | -0,925877063 |
| SGMS1-AS1 | -0,918280891 |
| SGK1      | -0,915223829 |
| GPR158    | -0,906955945 |
| NKX1-2    | -0,898913085 |
| FST       | -0,875106655 |
| HLA-DPA1  | -0,873117803 |
| BHMG1     | -0,868743117 |
| NCKAP1L   | -0,868637894 |
| IRF2      | -0,859968629 |
| TNFAIP3   | -0,857705082 |

|              |              |
|--------------|--------------|
| NAV3         | -0,851290034 |
| FCGBP        | -0,847188994 |
| DLGAP1-AS2   | -0,843425437 |
| LOC101928279 | -0,840975071 |
| MARCH3       | -0,814999349 |
| FTH1         | -0,804273034 |
| RBBP8NL      | -0,802647152 |
| BSN          | -0,789656326 |
| DIAPH2       | -0,787345628 |
| MAFB         | -0,783474946 |
| QKI          | -0,756791835 |
| FN1          | -0,74981229  |
| ICAM1        | -0,74734029  |
| ICOSLG       | -0,74287242  |
| DNAH5        | -0,733786011 |
| FOXP1        | -0,728137382 |
| BACH1        | -0,725069541 |
| LOC100288181 | -0,717299421 |
| AHCYL2       | -0,716966858 |
| CEBPD        | -0,715038032 |
| GALNT14      | -0,703378743 |
| SLCO3A1      | -0,703000467 |
| RMRP         | -0,700604722 |
| PRKACB       | -0,700406278 |
| NPHS1        | -0,699192179 |
| EBF1         | -0,692776819 |
| LOC100133091 | -0,692597227 |
| ITGA2        | -0,686971381 |
| KANSL1L      | -0,686468549 |
| DUSP16       | -0,681005153 |
| SLC43A2      | -0,678282735 |
| DDI2         | -0,676145919 |
| ALOX5        | -0,673611886 |
| MT1X         | -0,667365497 |
| FBXL19-AS1   | -0,664075608 |
| NCOA7        | -0,644217423 |
| SEMA6A       | -0,623410088 |
| EXT1         | -0,622892418 |
| NR4A2        | -0,622031998 |
| DDX60L       | -0,610183968 |
| CYP27B1      | -0,591743917 |
| PVRL4        | -0,58543974  |
| OGDHL        | -0,584449016 |
| RAD54L2      | -0,577046508 |
| TGFBR3       | -0,57571949  |
| ELK3         | -0,57404786  |
| CECR7        | -0,573907129 |

|            |              |
|------------|--------------|
| DTNA       | -0,573315192 |
| CSTB       | -0,571631582 |
| RC3H2      | -0,567478561 |
| DSE        | -0,565735797 |
| KSR1       | -0,559877561 |
| ZAK        | -0,557241989 |
| ASXL2      | -0,554846843 |
| CD82       | -0,554822486 |
| RRAD       | -0,5540181   |
| SORBS1     | -0,552590486 |
| GRAMD2     | -0,549179088 |
| DOC2B      | -0,547796373 |
| MFSD2A     | -0,546897568 |
| OR51B4     | -0,545878768 |
| SLC9A5     | -0,545426222 |
| DNAH17-AS1 | -0,542129611 |
| AREG       | -0,541178443 |
| TARBP1     | -0,520331571 |
| C1RL-AS1   | -0,517782526 |
| HYAL1      | -0,511521559 |
| LRRC8B     | -0,508569529 |
| SLC16A9    | -0,508001082 |
| BRSK2      | -0,507351102 |
| EFNA1      | -0,50685317  |
| CXCL16     | -0,506474164 |
| RFX7       | -0,504995335 |
| CRACR2A    | -0,503007818 |
| LYRM1      | -0,502151265 |
| KLHL15     | -0,501143754 |
| SEMA3C     | -0,498602325 |
| PLAUR      | -0,497872393 |
| GRHL1      | -0,496658915 |
| VPS9D1-AS1 | -0,49610435  |
| MREG       | -0,493244602 |
| FAM208B    | -0,483542763 |
| PSD3       | -0,482509388 |
| KCNC4      | -0,477920206 |
| C11orf30   | -0,477368717 |
| IQCD       | -0,476860575 |
| DDN        | -0,474691512 |
| SNX13      | -0,473411685 |
| VDR        | -0,470620657 |
| SESTD1     | -0,467779147 |
| MCOLN2     | -0,467667564 |
| SLC39A8    | -0,466848159 |
| PIAS1      | -0,465938132 |
| IGSF9      | -0,465897151 |

|          |              |
|----------|--------------|
| MSI2     | -0,465554076 |
| WNK2     | -0,462241617 |
| MAFG-AS1 | -0,46183392  |
| BBC3     | -0,461535139 |
| DMXL2    | -0,459809689 |
| RELL2    | -0,456814516 |
| PPP4R2   | -0,453401013 |
| OSMR     | -0,4528341   |
| RBMXL1   | -0,451007764 |
| IPO11    | -0,446892553 |
| HLA-DRB1 | -0,443305666 |
| APOO     | -0,441114061 |
| SLC7A2   | -0,439479497 |
| ACO1     | -0,436451409 |
| GFPT2    | -0,433871026 |
| C10orf2  | -0,433144275 |
| ZNF468   | -0,431075157 |
| ZNF800   | -0,430848277 |
| FAM160A1 | -0,425997848 |
| SYT1     | -0,42331469  |
| AHI1     | -0,423146325 |
| PON2     | -0,421558011 |
| ETV3     | -0,415675612 |
| DUSP2    | -0,415278167 |
| ENGASE   | -0,414411458 |
| PUS1     | -0,413404831 |
| RALGAPA1 | -0,413152716 |
| FA2H     | -0,41192704  |
| EPHB2    | -0,41111845  |
| SULF2    | -0,409920499 |
| SLCO4A1  | -0,409406537 |
| FAT1     | -0,408601735 |
| CDC42EP2 | -0,406915061 |
| MT2A     | -0,404896875 |
| FAM83G   | -0,404041756 |
| DDHD1    | -0,402872038 |
| TNS3     | -0,40272177  |
| IL1RAP   | -0,402271466 |
| PLXNB1   | -0,401876562 |
| SLC25A37 | -0,399083349 |
| PDZD8    | -0,397074126 |
| MR1      | -0,3966897   |
| CHD7     | -0,39667069  |
| KLHL18   | -0,396234726 |
| TP53     | -0,395679211 |
| ZNF8     | -0,395042357 |
| ANKRD17  | -0,394001015 |

|              |              |
|--------------|--------------|
| SLC4A7       | -0,391900109 |
| LRP6         | -0,391759311 |
| MOCOS        | -0,387334358 |
| MBNL1        | -0,386730323 |
| ZFP36L2      | -0,384912534 |
| FAM206A      | -0,383248295 |
| SLC8B1       | -0,382943572 |
| APOBEC3F     | -0,382146546 |
| NUP155       | -0,381365864 |
| ZNF91        | -0,380759376 |
| CYLD         | -0,38073688  |
| FAM135A      | -0,379513176 |
| PRDM15       | -0,378421689 |
| PPAPDC2      | -0,377486442 |
| SPINT1       | -0,377253739 |
| FAM155B      | -0,376949731 |
| GCH1         | -0,374070737 |
| FAM86C2P     | -0,373875736 |
| PALB2        | -0,372927689 |
| SLC2A6       | -0,372107953 |
| IFNAR2       | -0,37160798  |
| APOBEC3C     | -0,371596751 |
| BID          | -0,37103921  |
| ZFC3H1       | -0,370440069 |
| POLR3B       | -0,37030927  |
| DDX21        | -0,369115939 |
| SNAPC4       | -0,368819696 |
| SUSD6        | -0,368570375 |
| PCCA         | -0,368532486 |
| ARHGAP26     | -0,367358954 |
| TRAF3IP2     | -0,366949269 |
| TRMT44       | -0,366683031 |
| ZNF281       | -0,365998616 |
| TOMM40L      | -0,365360268 |
| TMEM164      | -0,365009876 |
| NUDT16P1     | -0,364155136 |
| ABLIM1       | -0,362094989 |
| GTF3C4       | -0,361609223 |
| MYCBP2       | -0,361421782 |
| SOGA1        | -0,361062482 |
| LOC100130899 | -0,358699995 |
| SDC4         | -0,357274135 |
| DNAAF2       | -0,35724813  |
| WIPF3        | -0,356193648 |
| KIAA1804     | -0,356045171 |
| HS6ST2       | -0,354388846 |
| GPATCH2L     | -0,353207394 |

|          |              |
|----------|--------------|
| TXLNG    | -0,352423301 |
| RAI14    | -0,351660814 |
| ZNF827   | -0,351646661 |
| NKX3-1   | -0,350091162 |
| CPNE7    | -0,349927559 |
| STEAP3   | -0,346637479 |
| PDPR     | -0,346612267 |
| PROCR    | -0,345678121 |
| WDR90    | -0,345369625 |
| CHST11   | -0,344212298 |
| MPZL2    | -0,341140767 |
| MPP6     | -0,340905388 |
| AHCTF1   | -0,340506626 |
| SCO2     | -0,3403019   |
| EPC2     | -0,339871378 |
| ZFAND4   | -0,338541219 |
| PNKD     | -0,337826064 |
| DHX34    | -0,337821701 |
| CSNK1A1  | -0,336317037 |
| TRAF3    | -0,336276678 |
| GDAP1    | -0,334715826 |
| SPTBN2   | -0,333622541 |
| MAP2K3   | -0,332998196 |
| PRMT9    | -0,332154194 |
| ICE1     | -0,331546403 |
| TRIB1    | -0,3308704   |
| ZNF271P  | -0,32878075  |
| WDR12    | -0,328564332 |
| PRKDC    | -0,328531734 |
| USP42    | -0,326194035 |
| RMND5A   | -0,325639507 |
| SBK1     | -0,325284654 |
| GTDC1    | -0,324316846 |
| CAPN15   | -0,323365814 |
| XPO4     | -0,322928696 |
| PSME4    | -0,322373377 |
| DPH2     | -0,321849302 |
| HPS5     | -0,321171256 |
| XBP1     | -0,321116906 |
| WDR43    | -0,321065271 |
| XXYL1    | -0,320879313 |
| CEBPZ    | -0,320155473 |
| BMS1P20  | -0,320031878 |
| TMEM39A  | -0,316268    |
| TRIM36   | -0,315626524 |
| PLEKHH1  | -0,315350641 |
| B4GALNT3 | -0,315112439 |



|          |              |
|----------|--------------|
| SEC23IP  | -0,314737611 |
| GUF1     | -0,31463164  |
| PTGES2   | -0,31429799  |
| TGS1     | -0,313538567 |
| OAT      | -0,313379713 |
| TBC1D30  | -0,312838525 |
| HMGCS1   | -0,312612198 |
| PTP4A2   | -0,311383622 |
| SLC31A1  | -0,311325534 |
| SIM2     | -0,31032901  |
| NOL11    | -0,309673697 |
| NEURL4   | -0,309237452 |
| TMEM125  | -0,309056646 |
| ABCA2    | -0,308876867 |
| PUM1     | -0,308707293 |
| USP6NL   | -0,308495916 |
| KIAA1147 | -0,307594625 |
| HEATR1   | -0,3075512   |
| ERCC6L2  | -0,306337596 |
| TEX10    | -0,305450803 |
| KCNQ2    | -0,305279167 |
| NOL6     | -0,305157751 |
| SLC25A12 | -0,304670881 |
| KIAA1143 | -0,302268966 |
| KLHL20   | -0,302171774 |
| TAF4B    | -0,302018732 |
| E2F4     | -0,301472729 |
| SLC18B1  | -0,301431018 |
| NSMAF    | -0,301388549 |
| BAZ1A    | -0,300867318 |
| LRPPRC   | -0,30044914  |
| PTPRK    | -0,300206734 |
| DNAJC16  | -0,299624424 |
| CYB5D1   | -0,298952234 |
| IARS     | -0,29785681  |
| NINJ1    | -0,29776007  |
| SUPV3L1  | -0,297651519 |
| METTL8   | -0,297376734 |
| ORC5     | -0,297237858 |
| DDX3X    | -0,296763586 |
| SLC25A32 | -0,296680553 |
| KAZN     | -0,296608632 |
| HCG18    | -0,294077942 |
| POLR3H   | -0,293428685 |
| CIPC     | -0,292806075 |
| PALD1    | -0,291662033 |
| ZNF286A  | -0,291608469 |

|          |              |
|----------|--------------|
| RPS6KA3  | -0,291058833 |
| CMTM4    | -0,289421951 |
| TGIF1    | -0,289023111 |
| LETM1    | -0,288706803 |
| DENND2D  | -0,287939559 |
| RPS6KB1  | -0,287842929 |
| PPAT     | -0,286767577 |
| NAA15    | -0,28635937  |
| C6orf120 | -0,286059151 |
| CNOT1    | -0,284817186 |
| PLXNA1   | -0,284808064 |
| PRR14L   | -0,284144025 |
| SRC      | -0,284041436 |
| MRPL30   | -0,283827797 |
| WRAP73   | -0,282404098 |
| XPOT     | -0,280833991 |
| DNAJC2   | -0,280221563 |
| FBXL18   | -0,279751873 |
| ZNF142   | -0,279320038 |
| PCCB     | -0,279041396 |
| SQSTM1   | -0,277940811 |
| TPR      | -0,277900622 |
| NOP14    | -0,276771118 |
| CC2D2A   | -0,274919598 |
| RRP1B    | -0,274471118 |
| PDCD11   | -0,273247936 |
| NAT9     | -0,272719422 |
| MAK16    | -0,272644024 |
| EML4     | -0,272195161 |
| NKRF     | -0,272067704 |
| RNASEH1  | -0,27169341  |
| POP1     | -0,271572491 |
| NFE2L2   | -0,271116743 |
| DNM1L    | -0,270855978 |
| IFT57    | -0,270807618 |
| TRMT10C  | -0,269416701 |
| FAM120A  | -0,268039472 |
| THUMPD1  | -0,26536383  |
| CLDN12   | -0,264878502 |
| RIOK1    | -0,263391443 |
| ARRB1    | -0,262252527 |
| NFYA     | -0,259629657 |
| ZNF335   | -0,258709276 |
| ISG20L2  | -0,258705122 |
| ATP6V1C1 | -0,258052263 |
| SNRNP200 | -0,258038019 |
| GTF2I    | -0,256876346 |

|          |              |
|----------|--------------|
| FAM98A   | -0,256087319 |
| AEN      | -0,255807023 |
| IDH3A    | -0,255545716 |
| PRMT5    | -0,255525313 |
| HSPA4    | -0,254458819 |
| RPL7L1   | -0,253573223 |
| TRMT5    | -0,253432806 |
| RABEP1   | -0,252551367 |
| KIAA0100 | -0,251220047 |
| PVRL1    | -0,250336026 |
| SKIV2L2  | -0,249767848 |
| PPRC1    | -0,249168117 |
| NUP98    | -0,248245928 |
| CDK12    | -0,247836538 |
| GCN1     | -0,247121252 |
| ACACA    | -0,246561314 |
| PRRC2C   | -0,245643943 |
| TRRAP    | -0,243366437 |
| ZNF384   | -0,242514332 |
| MINA     | -0,242510194 |
| KDM2B    | -0,241584671 |
| ESF1     | -0,241505019 |
| TTF2     | -0,240954493 |
| MED12    | -0,240953382 |
| INTS10   | -0,240646647 |
| RFT1     | -0,240489139 |
| KIAA0907 | -0,240463069 |
| ZNF207   | -0,24009409  |
| MAML1    | -0,239811738 |
| PPP6R2   | -0,239222927 |
| CLUH     | -0,238729163 |
| NUP153   | -0,238598083 |
| FADS1    | -0,237944884 |
| PRPF38B  | -0,236968878 |
| NOA1     | -0,23661318  |
| DHX30    | -0,235020888 |
| DENND5A  | -0,234424778 |
| EP400    | -0,233585115 |
| QSOX2    | -0,233534683 |
| WDR75    | -0,232538022 |
| NOLC1    | -0,231941203 |
| PFKM     | -0,231897133 |
| EIF3E    | -0,23178662  |
| MCCC2    | -0,231786254 |
| PRPF38A  | -0,231522707 |
| DEPDC5   | -0,23028195  |
| TOP1     | -0,229436554 |

|          |              |
|----------|--------------|
| NEK9     | -0,229062687 |
| MOGS     | -0,227405636 |
| LARS     | -0,224679693 |
| YTHDF2   | -0,224621639 |
| VHL      | -0,223514878 |
| SPEN     | -0,222104037 |
| SLC41A1  | -0,221653361 |
| EIF2A    | -0,221255886 |
| SEC16A   | -0,219134197 |
| NUDT16   | -0,217917723 |
| MED1     | -0,215350281 |
| ZNF146   | -0,215024643 |
| TMEM120B | -0,21476491  |
| TCERG1   | -0,214422433 |
| DCUN1D5  | -0,214271773 |
| NSD1     | -0,214251746 |
| MTIF2    | -0,213816387 |
| CACTIN   | -0,212871105 |
| COX15    | -0,209850508 |
| INTS1    | -0,208177371 |
| PMPCB    | -0,207320619 |
| GBA2     | -0,205805555 |
| KPNA6    | -0,204017976 |
| TSR1     | -0,203931692 |
| TRAF7    | -0,203793274 |
| ADCY3    | -0,203318819 |
| CAD      | -0,20320761  |
| PIEZO1   | -0,202887886 |
| ORC2     | -0,200821537 |
| ADGRL1   | -0,197581006 |
| POLR3A   | -0,195978803 |
| ETF1     | -0,19513198  |
| SLC7A6   | -0,194737181 |
| CPSF2    | -0,192289017 |
| SENP6    | -0,191716702 |
| SRCAP    | -0,191135391 |
| TCEB3    | -0,190132229 |
| GNL2     | -0,183774324 |
| PRPF8    | -0,183203117 |
| XRCC5    | -0,182184653 |
| ANAPC5   | -0,1802782   |
| BCLAF1   | -0,169560591 |
| LARP1    | -0,154374671 |

Upregulated

| <b>Gene</b> | <b>log2FoldChange</b> |
|-------------|-----------------------|
| KIF1C       | 0,15952036            |
| ARPC5       | 0,16101527            |
| CALM1       | 0,17156401            |
| TBL2        | 0,18107747            |
| PAQR4       | 0,18534271            |
| PPP1R37     | 0,19547573            |
| CALCOCO2    | 0,19712869            |
| ATP6V1G1    | 0,1980781             |
| GOLGA2      | 0,19964055            |
| TMEM14C     | 0,2003145             |
| IDH1        | 0,20046439            |
| SUMF1       | 0,20103827            |
| DEF6        | 0,2019171             |
| ZFYVE21     | 0,20295959            |
| NCK2        | 0,20398839            |
| KBTBD2      | 0,21026326            |
| NAGA        | 0,21066374            |
| COPS8       | 0,21176983            |
| TIPRL       | 0,21252858            |
| DSTN        | 0,21308275            |
| REEP5       | 0,21480672            |
| PCMT1       | 0,21579416            |
| PSMC2       | 0,22021877            |
| CBLC        | 0,22117821            |
| PLCD3       | 0,22125356            |
| SLC35D2     | 0,22225822            |
| ABRACL      | 0,22467295            |
| TCIRG1      | 0,22556726            |
| SUN1        | 0,22700549            |
| PALM        | 0,22816202            |
| TOX2        | 0,22874903            |
| DMTN        | 0,2303921             |
| SYPL1       | 0,23041942            |
| HTATIP2     | 0,23205442            |
| RHEB        | 0,23355304            |
| ATP6V1E1    | 0,2340063             |
| CRAT        | 0,23425758            |
| SNX7        | 0,23429248            |
| EID1        | 0,23539544            |
| MICU1       | 0,23561681            |
| SBDS        | 0,23788956            |
| MAFK        | 0,2393126             |
| SUN2        | 0,24006063            |
| TRIM35      | 0,24081514            |
| APLP1       | 0,24089697            |
| ATP6AP2     | 0,240928              |

|              |            |
|--------------|------------|
| GPR161       | 0,24449211 |
| SRD5A1       | 0,24473425 |
| HEBP1        | 0,24537256 |
| PPAP2C       | 0,24808549 |
| RHOC         | 0,24865206 |
| SLC50A1      | 0,25006034 |
| KIAA1279     | 0,25082761 |
| IQGAP3       | 0,25101894 |
| FUNDC1       | 0,25103231 |
| SPATS2L      | 0,25253272 |
| MVP          | 0,25279646 |
| CDK2         | 0,25325014 |
| DERA         | 0,2538247  |
| GS1-124K5,11 | 0,25495109 |
| ETV5         | 0,25549728 |
| GSDMD        | 0,25622801 |
| GDI1         | 0,25670455 |
| H3F3B        | 0,25800567 |
| PREP         | 0,25810451 |
| ISCA2        | 0,25940648 |
| STYXL1       | 0,2602952  |
| GNAI2        | 0,26059156 |
| CTSZ         | 0,26277348 |
| LASP1        | 0,2631714  |
| COL6A1       | 0,26366074 |
| ABHD12       | 0,26405764 |
| POR          | 0,26470413 |
| FAAH         | 0,26517553 |
| MELK         | 0,26522841 |
| HABP4        | 0,26598697 |
| CETN2        | 0,26770171 |
| CCNH         | 0,26982508 |
| GHDC         | 0,26988863 |
| TES          | 0,27285702 |
| MAD2L1BP     | 0,27299246 |
| ATP6AP1      | 0,27383609 |
| SPRYD7       | 0,27407767 |
| FHL3         | 0,27498728 |
| CORO1C       | 0,2762877  |
| TRIOBP       | 0,2771898  |
| GSN          | 0,27877558 |
| TPM4         | 0,27919779 |
| OS9          | 0,2798409  |
| MIDN         | 0,27997893 |
| BNIP3        | 0,28021259 |
| VGLL4        | 0,28057027 |
| PHF1         | 0,28066595 |

|           |            |
|-----------|------------|
| AIG1      | 0,2810459  |
| PHF13     | 0,28211109 |
| CPNE2     | 0,2821931  |
| MIF4GD    | 0,28392821 |
| TNFRSF12A | 0,28401674 |
| PTGR1     | 0,28442679 |
| CALM2     | 0,28477096 |
| MXRA7     | 0,28480255 |
| S100PBP   | 0,28510329 |
| CAV2      | 0,2852008  |
| CSPG4     | 0,28524906 |
| EHD2      | 0,28580924 |
| MAP3K3    | 0,28593399 |
| GLIPR2    | 0,28643358 |
| SHARPIN   | 0,28662291 |
| SCOC      | 0,28671492 |
| HSPB11    | 0,2887434  |
| TNNT1     | 0,28890298 |
| ADGRE5    | 0,29024874 |
| ARL6IP1   | 0,2924957  |
| ZDHHC12   | 0,29497532 |
| DOK1      | 0,29509654 |
| LMF2      | 0,29518844 |
| FAM3C     | 0,2959252  |
| TMEM134   | 0,29592729 |
| ARL6IP5   | 0,2966659  |
| PLEKHA2   | 0,29672529 |
| IFRD1     | 0,29774767 |
| CCDC92    | 0,29913658 |
| UNC93B1   | 0,29930836 |
| GAS2L1    | 0,30126224 |
| AES       | 0,30148126 |
| CERCAM    | 0,3022503  |
| ANKRD9    | 0,30237347 |
| TMEM87A   | 0,30392276 |
| FBXO2     | 0,30460779 |
| NXN       | 0,30519201 |
| ARHGDI1A  | 0,30535304 |
| WSB1      | 0,30540757 |
| NT5C      | 0,30557784 |
| DCK       | 0,30658312 |
| PCTP      | 0,30746473 |
| SYNPO     | 0,30829294 |
| CCDC9     | 0,30864316 |
| DCBLD2    | 0,30931832 |
| ZFP36     | 0,3104009  |
| HSF2      | 0,31048974 |

|          |            |
|----------|------------|
| GLUL     | 0,31173021 |
| CNN3     | 0,31253959 |
| SORBS3   | 0,31265236 |
| OSBPL10  | 0,31304479 |
| CRLF1    | 0,31351625 |
| FN3KRP   | 0,31359267 |
| ANXA2    | 0,31479804 |
| ACTN4    | 0,3171093  |
| CYTH2    | 0,31744373 |
| TRIP10   | 0,31814185 |
| HES2     | 0,31872148 |
| CNEP1R1  | 0,31934752 |
| MACF1    | 0,31972261 |
| CD9      | 0,32059965 |
| SMYD3    | 0,32199547 |
| H1FX     | 0,3229483  |
| ITPKB    | 0,32316255 |
| KIAA1715 | 0,32374665 |
| H1F0     | 0,32406778 |
| HOXA10   | 0,32448072 |
| ZNF185   | 0,32452379 |
| BAIAP2   | 0,32482262 |
| PLP2     | 0,32606024 |
| CLK1     | 0,32633314 |
| RASSF1   | 0,32735674 |
| CTSV     | 0,32785123 |
| WDR54    | 0,32915064 |
| MYADM    | 0,33081652 |
| CAPNS1   | 0,331184   |
| SYTL1    | 0,33124792 |
| CLUAP1   | 0,33126903 |
| CRYZ     | 0,33195212 |
| MYH9     | 0,33202391 |
| CTDSPL   | 0,33338117 |
| FAM89B   | 0,33338393 |
| MSANTD3  | 0,33360112 |
| DNAJB6   | 0,33391624 |
| GGT7     | 0,33408222 |
| ALS2     | 0,33529479 |
| MFI2     | 0,33719395 |
| RASSF7   | 0,33950524 |
| C11orf68 | 0,33970738 |
| IFI27L2  | 0,34167401 |
| ZFYVE1   | 0,34193847 |
| TM2D2    | 0,34298852 |
| TMEM120A | 0,34391004 |
| SPSB1    | 0,34405944 |



|         |            |
|---------|------------|
| FADD    | 0,34530697 |
| AMOTL2  | 0,34559244 |
| SLC25A4 | 0,34563232 |
| EMP3    | 0,34614174 |
| LATS2   | 0,34623846 |
| INSIG2  | 0,34722408 |
| TCF7    | 0,34732893 |
| CENPU   | 0,34840889 |
| RGS3    | 0,34845512 |
| UBXN2A  | 0,35287472 |
| DLX4    | 0,35393376 |
| FAM64A  | 0,35438571 |
| WRB     | 0,35442345 |
| RBCK1   | 0,35490778 |
| KATNAL1 | 0,35695033 |
| OLFML2A | 0,35709596 |
| POLD4   | 0,35720489 |
| DRAP1   | 0,35892321 |
| REEP1   | 0,36005918 |
| ALDH3B1 | 0,36068569 |
| ING1    | 0,36072851 |
| EBF4    | 0,36113711 |
| CCDC88B | 0,36114638 |
| ZNF250  | 0,36258159 |
| KALRN   | 0,36341782 |
| LZTS1   | 0,36531075 |
| GPC4    | 0,36662669 |
| ZNF365  | 0,36717927 |
| LMBRD1  | 0,3672833  |
| RASSF4  | 0,36793712 |
| HAUS8   | 0,37111786 |
| ZNRF2   | 0,37112264 |
| PECR    | 0,37121442 |
| FRS3    | 0,37254546 |
| CALB2   | 0,3726836  |
| SOX9    | 0,37352369 |
| PRKAG2  | 0,37397597 |
| ENDOD1  | 0,37399651 |
| C5orf30 | 0,37435216 |
| LMNA    | 0,37505298 |
| ROGDI   | 0,37743325 |
| C4orf33 | 0,37774752 |
| MROH6   | 0,37784813 |
| FUT8    | 0,37805882 |
| PRDX5   | 0,37887438 |
| CEP55   | 0,38032442 |
| IRF9    | 0,38143056 |

|         |            |
|---------|------------|
| HOXC6   | 0,38222148 |
| ACAP3   | 0,38455146 |
| TMEM65  | 0,38466186 |
| MSLN    | 0,38525952 |
| NES     | 0,38628126 |
| ZNF385A | 0,38675847 |
| RAD54L  | 0,38705304 |
| FSCN1   | 0,38714627 |
| CTNNAL1 | 0,38755453 |
| PRR7    | 0,38872707 |
| PAAF1   | 0,38982985 |
| IER5L   | 0,38999353 |
| CCDC85B | 0,39016509 |
| EFNA2   | 0,39126996 |
| HOXB7   | 0,39227527 |
| LSR     | 0,39310209 |
| RIPK4   | 0,39380027 |
| MAP3K14 | 0,39470868 |
| SRD5A3  | 0,39508166 |
| RGS14   | 0,39551022 |
| CASP6   | 0,39551104 |
| RAB20   | 0,39557372 |
| NPC2    | 0,39605715 |
| SHISA4  | 0,39647541 |
| ANXA1   | 0,40113203 |
| PLA2G15 | 0,40172117 |
| STMN1   | 0,40243174 |
| CRIP1   | 0,40280202 |
| PPDPF   | 0,404133   |
| MFGE8   | 0,40549256 |
| ARC     | 0,40588672 |
| ENO2    | 0,40827839 |
| SAP30   | 0,4086073  |
| FLOT1   | 0,40952479 |
| PMP22   | 0,40965073 |
| TAB3    | 0,41584802 |
| FXVD5   | 0,41884026 |
| TNS2    | 0,42049609 |
| RAMP1   | 0,42065132 |
| HOXB5   | 0,42072733 |
| HES1    | 0,42233178 |
| NUCB2   | 0,42278995 |
| STK17A  | 0,42283623 |
| CUL4B   | 0,42456913 |
| KNDC1   | 0,42461253 |
| PTTG1IP | 0,42488865 |
| SEPT4   | 0,42621823 |

|           |            |
|-----------|------------|
| SLCO1B3   | 0,42734224 |
| CRIP2     | 0,42804125 |
| RNF122    | 0,42836869 |
| ALCAM     | 0,42862085 |
| C8orf58   | 0,42876038 |
| UPK1A-AS1 | 0,42883487 |
| COL13A1   | 0,42903329 |
| ASAP2     | 0,43059437 |
| LOXL2     | 0,43137861 |
| SARDH     | 0,4320649  |
| TNFSF12   | 0,43326189 |
| AXL       | 0,43326419 |
| MOK       | 0,43351723 |
| LIPE      | 0,43500663 |
| NKX6-1    | 0,43798315 |
| TMEM59L   | 0,43943347 |
| LINC00152 | 0,44003815 |
| CDH15     | 0,44046713 |
| ABLIM3    | 0,44367416 |
| TMEM173   | 0,44448033 |
| TLE6      | 0,44485175 |
| LHX6      | 0,44609143 |
| CACFD1    | 0,44648444 |
| DBP       | 0,45015809 |
| DUSP23    | 0,45097263 |
| CHRD      | 0,45226168 |
| MGC50722  | 0,45243131 |
| WNT6      | 0,45248785 |
| CYB5R2    | 0,45285456 |
| STIM1     | 0,45951865 |
| GATA2     | 0,45972038 |
| LAMB1     | 0,45996662 |
| PRICKLE1  | 0,46489738 |
| CDC42EP3  | 0,46497099 |
| PLK2      | 0,46613526 |
| REEP3     | 0,46832531 |
| MXD3      | 0,47311293 |
| UBASH3B   | 0,47867429 |
| HEXIM2    | 0,47906722 |
| ADAMTS14  | 0,48112264 |
| KLF2      | 0,48494619 |
| DCAF4     | 0,4860126  |
| WWC3      | 0,48913835 |
| ULBP2     | 0,49145855 |
| ADM       | 0,49378013 |
| C11orf71  | 0,49454281 |
| HTR1D     | 0,49868936 |

|            |            |
|------------|------------|
| CLIC3      | 0,49972636 |
| CDKN2C     | 0,49983164 |
| SLC22A18AS | 0,50370007 |
| ESAM       | 0,50794729 |
| S100A10    | 0,50850248 |
| MAP2       | 0,50971426 |
| TBX3       | 0,5111496  |
| CD22       | 0,51136187 |
| GLT8D2     | 0,51172413 |
| ADAMTS17   | 0,51359956 |
| ST6GALNAC2 | 0,51404687 |
| PDLIM2     | 0,51669116 |
| ADSSL1     | 0,51682065 |
| GCA        | 0,51795017 |
| ETS1       | 0,51818656 |
| ATP8B3     | 0,52447061 |
| PTPRN2     | 0,52503258 |
| MBNL3      | 0,52816228 |
| NKX2-8     | 0,52853886 |
| MPND       | 0,53021747 |
| SAMD11     | 0,53252751 |
| PRIMA1     | 0,5327471  |
| RNASE4     | 0,53556006 |
| PADI2      | 0,53799233 |
| MALL       | 0,54319386 |
| FOLR1      | 0,54985265 |
| CYP26B1    | 0,54985336 |
| TENM3      | 0,55236833 |
| FNDC4      | 0,55496682 |
| TUBB4A     | 0,5563716  |
| SNORA32    | 0,56035202 |
| ST6GALNAC5 | 0,56343317 |
| PPM1K      | 0,56346184 |
| ZFYVE28    | 0,56906008 |
| FAM83E     | 0,57041368 |
| UBALD2     | 0,57283219 |
| MEF2C      | 0,5730158  |
| SP5        | 0,57720215 |
| TLN2       | 0,57761569 |
| CLIP4      | 0,58030926 |
| MIR22HG    | 0,58473256 |
| ANKRD37    | 0,58488108 |
| ITGB4      | 0,58723589 |
| PLCB2      | 0,58734691 |
| FBXO32     | 0,59449173 |
| OTUD1      | 0,59488679 |
| F10        | 0,59880904 |

|              |            |
|--------------|------------|
| FOXD1        | 0,60283809 |
| SMPD1        | 0,6078954  |
| LCAT         | 0,6166614  |
| STRA6        | 0,62510892 |
| CD24         | 0,6267846  |
| SESN3        | 0,63016574 |
| KCNIP3       | 0,63571255 |
| CYP4F11      | 0,63588216 |
| ZFP30        | 0,63770364 |
| SP110        | 0,64107287 |
| ARL4C        | 0,6418952  |
| BVES         | 0,64298943 |
| LINC00511    | 0,64709172 |
| HSD11B1L     | 0,65089314 |
| KHDRBS3      | 0,65198979 |
| CTGF         | 0,65774088 |
| EFNA5        | 0,66424044 |
| WNT16        | 0,66710382 |
| FAM189A2     | 0,67148984 |
| GPR162       | 0,6728861  |
| FRY          | 0,68071472 |
| AAMDC        | 0,70598605 |
| GNG13        | 0,70677734 |
| ENC1         | 0,71022217 |
| ART5         | 0,71361136 |
| HEG1         | 0,71841194 |
| RGS9         | 0,72219678 |
| PHYHIP       | 0,72236538 |
| HMCN1        | 0,72987865 |
| LYPD1        | 0,73282266 |
| MMP28        | 0,74321357 |
| SHC2         | 0,74623984 |
| JMJD1C-AS1   | 0,76734714 |
| MAP3K15      | 0,771474   |
| REEP2        | 0,77462948 |
| NPIPA5       | 0,7826008  |
| MAP1B        | 0,789897   |
| EVI2B        | 0,79432141 |
| INHBB        | 0,79722466 |
| SNAI2        | 0,80586097 |
| LOC102724279 | 0,81550344 |
| ALPP         | 0,81896411 |
| B3GALT4      | 0,82046565 |
| DLK2         | 0,83237643 |
| GPR176       | 0,84959781 |
| FBP1         | 0,8742353  |
| LOC101927884 | 0,88024482 |

|            |            |
|------------|------------|
| PKIB       | 0,88033221 |
| HPD        | 0,88146616 |
| GUCY2D     | 0,89684466 |
| PADI1      | 0,91280084 |
| SLC38A5    | 0,95677258 |
| ASCL5      | 0,96303998 |
| GNRH1      | 0,97049317 |
| KRT81      | 0,97601073 |
| GRIK2      | 0,99224553 |
| CBR3       | 1,0465E+13 |
| LCTL       | 1,1434E+13 |
| TGFBI      | 1,5947E+13 |
| CDK15      | 1,6705E+13 |
| FEZF1      | 1,0144E+14 |
| YBX2       | 1,0193E+14 |
| GPB1       | 1,026E+14  |
| CGB2       | 1,0324E+14 |
| KRT9       | 1,055E+14  |
| KIAA1549L  | 1,0604E+14 |
| PGM5P2     | 1,0763E+14 |
| PTHLH      | 1,0835E+14 |
| GSN-AS1    | 1,0874E+14 |
| KRT86      | 1,1151E+14 |
| OVOL2      | 1,1282E+14 |
| SIX2       | 1,2134E+14 |
| PI16       | 1,2683E+14 |
| ID3        | 1,3124E+14 |
| ACTA1      | 1,3426E+14 |
| PIR        | 1,3656E+14 |
| LINC01605  | 1,3764E+14 |
| TBC1D3F    | 1,4323E+14 |
| SERTAD4    | 1,5595E+14 |
| CXCR3      | 1,7696E+14 |
| KANSL1-AS1 | 1,9799E+14 |
| FOXS1      | 2,6719E+14 |
| RPH3A      | 2,7468E+14 |
| SLCO2A1    | 3,4889E+14 |
