# Supplementary material for: The synergism of SMC1A cohesin gene silencing and bevacizumab against colorectal cancer
Source: PubMed Central journal article supplement (PMC10870497; doi:10.1186/s13046-024-02976-2), 2024-02-16
Supplement: 13046_2024_2976_MOESM13_ESM.pdf [file 13046_2024_2976_MOESM13_ESM.pdf]

Table S8. Dysregulated pathways following shRNA, bevacizumab and combo treatments.

| <b>shRNA</b>                                                                             | Number of genes |
|------------------------------------------------------------------------------------------|-----------------|
| U2-type prespliceosome assembly (GO:1903241)                                             | 5               |
| peptidyl-threonine dephosphorylation (GO:0035970)                                        | 5               |
| ribosomal large subunit biogenesis (GO:0042273)                                          | 5               |
| chaperone mediated protein folding requiring cofactor (GO:0051085)                       | 5               |
| protein acetylation (GO:0006473)                                                         | 4               |
| inactivation of MAPK activity (GO:0000188)                                               | 4               |
| negative regulation of centriole replication (GO:0046600)                                | 3               |
| 7-methylguanosine cap hypermethylation (GO:0036261)                                      | 3               |
| <b>Bevacizumab</b>                                                                       | Number of genes |
| response to lipopolysaccharide (GO:0032496)                                              | 12              |
| negative regulation of cell growth (GO:0030308)                                          | 11              |
| regulation of actin cytoskeleton organization (GO:0032956)                               | 9               |
| actin cytoskeleton reorganization (GO:0031532)                                           | 8               |
| neuron apoptotic process (GO:0051402)                                                    | 8               |
| response to nutrient (GO:0007584)                                                        | 8               |
| positive regulation of substrate adhesion-dependent cell spreading (GO:1900026)          | 7               |
| release of sequestered calcium ion into cytosol (GO:0051209)                             | 6               |
| endoplasmic reticulum organization (GO:0007029)                                          | 6               |
| platelet aggregation (GO:0070527)                                                        | 6               |
| glutathione metabolic process (GO:0006749)                                               | 6               |
| T cell chemotaxis (GO:0010818)                                                           | 5               |
| positive regulation of innate immune response (GO:0045089)                               | 5               |
| positive regulation of mitotic cell cycle (GO:0045931)                                   | 5               |
| myelin assembly (GO:0032288)                                                             | 4               |
| regulation of high voltage-gated calcium channel activity (GO:1901841)                   | 4               |
| negative regulation of ryanodine-sensitive calcium-release channel activity (GO:0060315) | 4               |
| vitamin D receptor signaling pathway (GO:0070561)                                        | 3               |
| negative regulation of toll-like receptor 2 signaling pathway (GO:0034136)               | 3               |
| <b>Combo</b>                                                                             | Number of genes |
| defense response to virus (GO:0051607)                                                   | 19              |
| positive regulation of angiogenesis (GO:0045766)                                         | 18              |
| actin cytoskeleton organization (GO:0030036)                                             | 18              |
| positive regulation of I-kappaB kinase/NF-kappaB signaling (GO:0043123)                  | 18              |
| positive regulation of protein phosphorylation (GO:0001934)                              | 18              |
| skeletal system development (GO:0001501)                                                 | 15              |
| DNA-templated transcription, elongation (GO:0006354)                                     | 15              |
| cellular response to tumor necrosis factor (GO:0071356)                                  | 14              |
| canonical Wnt signaling pathway (GO:0060070)                                             | 13              |
| negative regulation of cell growth (GO:0030308)                                          | 13              |
| rRNA processing (GO:0006364)                                                             | 13              |
| cellular response to mechanical stimulus (GO:0071260)                                    | 12              |

|                                                                                                         |    |
|---------------------------------------------------------------------------------------------------------|----|
| transcription, DNA-templated (GO:0006351)                                                               | 12 |
| cellular response to interleukin-1 (GO:0071347)                                                         | 11 |
| positive regulation of cell growth (GO:0030307)                                                         | 11 |
| wound healing (GO:0042060)                                                                              | 11 |
| negative regulation of cysteine-type endopeptidase activity involved in apoptotic process (GO:0043154)  | 10 |
| response to wounding (GO:0009611)                                                                       | 10 |
| neural tube closure (GO:0001843)                                                                        | 10 |
| mRNA transport (GO:0051028)                                                                             | 10 |
| GO:0030199~collagen fibril organization                                                                 | 9  |
| heart looping (GO:0001947)                                                                              | 9  |
| cellular response to drug (GO:0035690)                                                                  | 9  |
| G1/S transition of mitotic cell cycle (GO:0000082)                                                      | 9  |
| positive regulation of intrinsic apoptotic signaling pathway (GO:2001244)                               | 8  |
| regulation of neurogenesis (GO:0050767)                                                                 | 8  |
| ephrin receptor signaling pathway (GO:0048013)                                                          | 8  |
| protein kinase B signaling (GO:0043491)                                                                 | 8  |
| positive regulation of fat cell differentiation (GO:0045600)                                            | 8  |
| positive regulation of extrinsic apoptotic signaling pathway (GO:2001238)                               | 7  |
| positive regulation of release of cytochrome c from mitochondria (GO:0090200)                           | 7  |
| T cell differentiation in thymus (GO:0033077)                                                           | 7  |
| positive regulation of Wnt signaling pathway (GO:0030177)                                               | 7  |
| cellular response to peptide hormone stimulus (GO:0071375)                                              | 6  |
| hematopoietic stem cell differentiation (GO:0060218)                                                    | 6  |
| motile cilium assembly (GO:0044458)                                                                     | 6  |
| establishment of skin barrier (GO:0061436)                                                              | 6  |
| positive regulation of cell migration involved in sprouting angiogenesis (GO:0090050)                   | 6  |
| mitochondrial calcium ion transport (GO:0006851)                                                        | 5  |
| response to steroid hormone (GO:0048545)                                                                | 5  |
| post-anal tail morphogenesis (GO:0036342)                                                               | 5  |
| negative regulation of stem cell differentiation (GO:2000737)                                           | 5  |
| nuclear envelope organization (GO:0006998)                                                              | 5  |
| female genitalia development (GO:0030540)                                                               | 4  |
| osteoclast development (GO:0036035)                                                                     | 4  |
| positive regulation of transcription from RNA polymerase II promoter in response to stress (GO:0036003) | 4  |
| positive regulation of rRNA processing (GO:2000234)                                                     | 4  |
| glomerular basement membrane development (GO:0032836)                                                   | 4  |
| nuclear-transcribed mRNA catabolic process, deadenylation-dependent decay (GO:0000288)                  | 4  |
| positive regulation of phagocytosis, engulfment (GO:0060100)                                            | 4  |
| oxidative stress-induced premature senescence (GO:0090403)                                              | 3  |
| response to gonadotropin (GO:0034698)                                                                   | 3  |
| epithelium development (GO:0060429)                                                                     | 3  |
| Wnt signaling pathway involved in somitogenesis (GO:0090244)                                            | 3  |
